# Supplementary material
Source: MDPI journal article supplement (https://www.mdpi.com/2673-1924/5/2/9)
Supplement: s1 [file s1]

Archive with 2 entries (2 files):
- oceans-2553279-Supplementary File S1.pdf
- oceans-2553279-Supplementary File S2.xlsx
