# Supplementary material
Source: MDPI journal article supplement (https://www.mdpi.com/2673-1924/5/2/9)
Supplement: s1 [file s1 › oceans-2553279-Supplementary File S2.xlsx]

## Sheet: seawater quality
tank	day	NO2	NH3	PO4	NO3	Ca2+	Mg2+	KH	pH	Temperature	Salinity
	units	mg/l	mg/l	mg/l	mg/l	mg/l	mg/l			C
1	0	0	0	0	0	500	1350	5.1	7.9	29	35
1	14	0	0	0	0	480	1200	7	8.25	29	35
1	28	0	0	0	0	510	1300	7	8.23	28	35
1	42	0	0	0	0	500	1350	6.4	8.27	28	36
1	56	0	0	0	0	450	1300	6.4	8.27	28	35
1	70	0	0	0	0	480	1350	7	8.24	28	35
1	84	0	0	0	0	460	1400	7	8.28	28	34
1	98	0	0	0	0	465	1500	6.1	8.25	29	35
1	112	0	0	0	0	450	1410	6.1	8.23	28	35
2	0	0	0	0	0	500	1350	5.1	7.9	29	35
2	14	0	0	0	0	450	1200	6.1	8.25	29	35
2	28	0	0	0	0	500	1320	8.6	8.31	28	35
2	42	0	0	0	0	500	1290	6.4	8.27	29	35
2	56	0	0	0	0	500	1300	7	8.1	29	35
2	70	0	0	0	0	440	1250	6.4	8.26	29	35
2	84	0	0	0	0	450	1300	7	8.24	28	34
2	98	0	0	0	0	480	1260	6	8.21	28	35
2	112	0	0	0	0	450	1050	6.4	8.24	29	35
3	0	0	0	0	0	500	1350	5.1	7.9	29	35
3	14	0	0	0	0	480	1290	6.1	8.25	29	35
3	28	0	0	0	0	415	1200	8	8.34	28	35
3	42	0	0	0	0	450	1250	7	8.31	29	35
3	56	0	0	0	0	450	1140	7	8.19	28	35
3	70	0	0	0	0	425	1200	7	8.21	29	35
3	84	0	0	0	0	400	1125	7.4	8.28	28	34
3	98	0	0	0	0	425	1140	7	8.28	29	35
3	112	0	0	0	0	400	1140	7.2	8.34	29	34
feeding	0	0	0	0	0	400	1050	6	8.15	29	35
feeding	14	0	0	0	10	425	1100	6.4	8.15	27	35
feeding	28	0	0	0	10	410	1250	7	8.25	28	35
feeding	42	0	0	0	25	400	1200	6.4	8.26	27	35
feeding	56	0	0	0	25	420	1260	6.7	8.15	28	35
feeding	70	0	0	0	25	420	1250	6.4	8.23	28	35
feeding	84	0	0	0	50	410	1240	6	8.31	29	35
feeding	98	0	0	0	50	450	1260	6.4	8	28	35
feeding	112	0	0	0	5	400	1050	6	8.14	29	35

## Sheet: tank flow
month-week	month	week	tank area	tank	orientation	flow (cm/s)
2023-09-01	September	1	1-forward	1	forward	6.5
2023-09-02	September	2	1-forward	1	forward	8.9
2023-09-03	September	3	1-forward	1	forward	8.1
2023-09-04	September	4	1-forward	1	forward	5.3
2023-10-01	October	1	1-forward	1	forward	6.7
2023-10-02	October	2	1-forward	1	forward	4.4
2023-10-03	October	3	1-forward	1	forward	6.4
2023-10-04	October	4	1-forward	1	forward	7.5
2023-11-01	November	1	1-forward	1	forward	5.5
2023-11-02	November	2	1-forward	1	forward	4
2023-11-03	November	3	1-forward	1	forward	5.9
2023-11-04	November	4	1-forward	1	forward	4.8
2023-09-01	September	1	1-backwards	1	backwards	4.9
2023-09-02	September	2	1-backwards	1	backwards	6.2
2023-09-03	September	3	1-backwards	1	backwards	5.3
2023-09-04	September	4	1-backwards	1	backwards	3.9
2023-10-01	October	1	1-backwards	1	backwards	4.2
2023-10-02	October	2	1-backwards	1	backwards	4.4
2023-10-03	October	3	1-backwards	1	backwards	4.9
2023-10-04	October	4	1-backwards	1	backwards	4.9
2023-11-01	November	1	1-backwards	1	backwards	4.3
2023-11-02	November	2	1-backwards	1	backwards	4.1
2023-11-03	November	3	1-backwards	1	backwards	4
2023-11-04	November	4	1-backwards	1	backwards	4.3
2023-09-01	September	1	2-forward	2	forward	5.8
2023-09-02	September	2	2-forward	2	forward	4.7
2023-09-03	September	3	2-forward	2	forward	6.5
2023-09-04	September	4	2-forward	2	forward	4.8
2023-10-01	October	1	2-forward	2	forward	6.5
2023-10-02	October	2	2-forward	2	forward	6.2
2023-10-03	October	3	2-forward	2	forward	8.6
2023-10-04	October	4	2-forward	2	forward	7.5
2023-11-01	November	1	2-forward	2	forward	8.5
2023-11-02	November	2	2-forward	2	forward	8.1
2023-11-03	November	3	2-forward	2	forward	8.4
2023-11-04	November	4	2-forward	2	forward	5.8
2023-09-01	September	1	2-backwards	2	backwards	6.7
2023-09-02	September	2	2-backwards	2	backwards	5.4
2023-09-03	September	3	2-backwards	2	backwards	7.4
2023-09-04	September	4	2-backwards	2	backwards	4
2023-10-01	October	1	2-backwards	2	backwards	5.2
2023-10-02	October	2	2-backwards	2	backwards	6.11
2023-10-03	October	3	2-backwards	2	backwards	5.1
2023-10-04	October	4	2-backwards	2	backwards	5.5
2023-11-01	November	1	2-backwards	2	backwards	4
2023-11-02	November	2	2-backwards	2	backwards	3.8
2023-11-03	November	3	2-backwards	2	backwards	5.8
2023-11-04	November	4	2-backwards	2	backwards	4.4
2023-09-01	September	1	3-forward	3	forward	7.8
2023-09-02	September	2	3-forward	3	forward	4.7
2023-09-03	September	3	3-forward	3	forward	5.5
2023-09-04	September	4	3-forward	3	forward	4.1
2023-10-01	October	1	3-forward	3	forward	3.9
2023-10-02	October	2	3-forward	3	forward	4.5
2023-10-03	October	3	3-forward	3	forward	5
2023-10-04	October	4	3-forward	3	forward	5.3
2023-11-01	November	1	3-forward	3	forward	4.1
2023-11-02	November	2	3-forward	3	forward	4.5
2023-11-03	November	3	3-forward	3	forward	5.4
2023-11-04	November	4	3-forward	3	forward	3.8
2023-09-01	September	1	3-backwards	3	backwards	4.1
2023-09-02	September	2	3-backwards	3	backwards	5.1
2023-09-03	September	3	3-backwards	3	backwards	6.2
2023-09-04	September	4	3-backwards	3	backwards	8
2023-10-01	October	1	3-backwards	3	backwards	7.6
2023-10-02	October	2	3-backwards	3	backwards	8.9
2023-10-03	October	3	3-backwards	3	backwards	4.4
2023-10-04	October	4	3-backwards	3	backwards	3.9
2023-11-01	November	1	3-backwards	3	backwards	3.7
2023-11-02	November	2	3-backwards	3	backwards	3.8
2023-11-03	November	3	3-backwards	3	backwards	3.9
2023-11-04	November	4	3-backwards	3	backwards	4.7

## Sheet: feeding data
feeding regime x time	feeding regime	feeding time	analysis day	Artemia (ind/ml)
high-0 hr	high	0 hr	0	69
high-0 hr	high	0 hr	0	55
high-0 hr	high	0 hr	0	74
high-0 hr	high	0 hr	0	65
high-0 hr	high	0 hr	0	55
high-0 hr	high	0 hr	0	65
high-0 hr	high	0 hr	0	74
high-0 hr	high	0 hr	0	60
high-0 hr	high	0 hr	0	60
high-3 hr	high	3 hr	0	42
high-3 hr	high	3 hr	0	54
high-3 hr	high	3 hr	0	43
high-3 hr	high	3 hr	0	56
high-3 hr	high	3 hr	0	40
high-3 hr	high	3 hr	0	45
high-3 hr	high	3 hr	0	47
high-3 hr	high	3 hr	0	40
high-3 hr	high	3 hr	0	45
high-6 hr	high	6 hr	0	31
high-6 hr	high	6 hr	0	43
high-6 hr	high	6 hr	0	40
high-6 hr	high	6 hr	0	55
high-6 hr	high	6 hr	0	45
high-6 hr	high	6 hr	0	46
high-6 hr	high	6 hr	0	30
high-6 hr	high	6 hr	0	45
high-6 hr	high	6 hr	0	52
low-0 hr	low	0 hr	0	15
low-0 hr	low	0 hr	0	25
low-0 hr	low	0 hr	0	25
low-0 hr	low	0 hr	0	20
low-0 hr	low	0 hr	0	21
low-0 hr	low	0 hr	0	15
low-0 hr	low	0 hr	0	18
low-0 hr	low	0 hr	0	12
low-0 hr	low	0 hr	0	10
low-3 hr	low	3 hr	0	6
low-3 hr	low	3 hr	0	8
low-3 hr	low	3 hr	0	5
low-3 hr	low	3 hr	0	8
low-3 hr	low	3 hr	0	5
low-3 hr	low	3 hr	0	9
low-3 hr	low	3 hr	0	7
low-3 hr	low	3 hr	0	7
low-3 hr	low	3 hr	0	5
low-6 hr	low	6 hr	0	3
low-6 hr	low	6 hr	0	4
low-6 hr	low	6 hr	0	4
low-6 hr	low	6 hr	0	3
low-6 hr	low	6 hr	0	5
low-6 hr	low	6 hr	0	4
low-6 hr	low	6 hr	0	4
low-6 hr	low	6 hr	0	4
low-6 hr	low	6 hr	0	3
high-0 hr	high	0 hr	14	67
high-0 hr	high	0 hr	14	37
high-0 hr	high	0 hr	14	38
high-0 hr	high	0 hr	14	43
high-0 hr	high	0 hr	14	38
high-0 hr	high	0 hr	14	20
high-0 hr	high	0 hr	14	37
high-0 hr	high	0 hr	14	43
high-0 hr	high	0 hr	14	65
high-3 hr	high	3 hr	14	26
high-3 hr	high	3 hr	14	33
high-3 hr	high	3 hr	14	29
high-3 hr	high	3 hr	14	33
high-3 hr	high	3 hr	14	29
high-3 hr	high	3 hr	14	30
high-3 hr	high	3 hr	14	40
high-3 hr	high	3 hr	14	22
high-3 hr	high	3 hr	14	31
high-6 hr	high	6 hr	14	19
high-6 hr	high	6 hr	14	24
high-6 hr	high	6 hr	14	19
high-6 hr	high	6 hr	14	22
high-6 hr	high	6 hr	14	24
high-6 hr	high	6 hr	14	18
high-6 hr	high	6 hr	14	25
high-6 hr	high	6 hr	14	23
high-6 hr	high	6 hr	14	15
low-0 hr	low	0 hr	14	16
low-0 hr	low	0 hr	14	14
low-0 hr	low	0 hr	14	18
low-0 hr	low	0 hr	14	8
low-0 hr	low	0 hr	14	12
low-0 hr	low	0 hr	14	18
low-0 hr	low	0 hr	14	14
low-0 hr	low	0 hr	14	19
low-0 hr	low	0 hr	14	10
low-3 hr	low	3 hr	14	3
low-3 hr	low	3 hr	14	1
low-3 hr	low	3 hr	14	1
low-3 hr	low	3 hr	14	0
low-3 hr	low	3 hr	14	0
low-3 hr	low	3 hr	14	0
low-3 hr	low	3 hr	14	1
low-3 hr	low	3 hr	14	0
low-3 hr	low	3 hr	14	2
low-6 hr	low	6 hr	14	1
low-6 hr	low	6 hr	14	3
low-6 hr	low	6 hr	14	1
low-6 hr	low	6 hr	14	1
low-6 hr	low	6 hr	14	1
low-6 hr	low	6 hr	14	1
low-6 hr	low	6 hr	14	1
low-6 hr	low	6 hr	14	4
low-6 hr	low	6 hr	14	2
high-0 hr	high	0 hr	28	41
high-0 hr	high	0 hr	28	34
high-0 hr	high	0 hr	28	53
high-0 hr	high	0 hr	28	51
high-0 hr	high	0 hr	28	36
high-0 hr	high	0 hr	28	49
high-0 hr	high	0 hr	28	64
high-0 hr	high	0 hr	28	62
high-0 hr	high	0 hr	28	67
high-3 hr	high	3 hr	28	11
high-3 hr	high	3 hr	28	9
high-3 hr	high	3 hr	28	24
high-3 hr	high	3 hr	28	36
high-3 hr	high	3 hr	28	3
high-3 hr	high	3 hr	28	14
high-3 hr	high	3 hr	28	3
high-3 hr	high	3 hr	28	7
high-3 hr	high	3 hr	28	8
high-6 hr	high	6 hr	28	12
high-6 hr	high	6 hr	28	4
high-6 hr	high	6 hr	28	8
high-6 hr	high	6 hr	28	16
high-6 hr	high	6 hr	28	11
high-6 hr	high	6 hr	28	24
high-6 hr	high	6 hr	28	15
high-6 hr	high	6 hr	28	17
high-6 hr	high	6 hr	28	20
low-0 hr	low	0 hr	28	38
low-0 hr	low	0 hr	28	15
low-0 hr	low	0 hr	28	37
low-0 hr	low	0 hr	28	31
low-0 hr	low	0 hr	28	29
low-0 hr	low	0 hr	28	27
low-0 hr	low	0 hr	28	30
low-0 hr	low	0 hr	28	35
low-0 hr	low	0 hr	28	24
low-3 hr	low	3 hr	28	2
low-3 hr	low	3 hr	28	1
low-3 hr	low	3 hr	28	3
low-3 hr	low	3 hr	28	1
low-3 hr	low	3 hr	28	2
low-3 hr	low	3 hr	28	2
low-3 hr	low	3 hr	28	5
low-3 hr	low	3 hr	28	7
low-3 hr	low	3 hr	28	9
low-6 hr	low	6 hr	28	1
low-6 hr	low	6 hr	28	2
low-6 hr	low	6 hr	28	1
low-6 hr	low	6 hr	28	3
low-6 hr	low	6 hr	28	1
low-6 hr	low	6 hr	28	4
low-6 hr	low	6 hr	28	6
low-6 hr	low	6 hr	28	3
low-6 hr	low	6 hr	28	5
high-0 hr	high	0 hr	42	70
high-0 hr	high	0 hr	42	78
high-0 hr	high	0 hr	42	59
high-0 hr	high	0 hr	42	80
high-0 hr	high	0 hr	42	76
high-0 hr	high	0 hr	42	115
high-0 hr	high	0 hr	42	65
high-0 hr	high	0 hr	42	86
high-0 hr	high	0 hr	42	60
high-3 hr	high	3 hr	42	54
high-3 hr	high	3 hr	42	82
high-3 hr	high	3 hr	42	69
high-3 hr	high	3 hr	42	77
high-3 hr	high	3 hr	42	60
high-3 hr	high	3 hr	42	47
high-3 hr	high	3 hr	42	42
high-3 hr	high	3 hr	42	53
high-3 hr	high	3 hr	42	47
high-6 hr	high	6 hr	42	44
high-6 hr	high	6 hr	42	50
high-6 hr	high	6 hr	42	51
high-6 hr	high	6 hr	42	42
high-6 hr	high	6 hr	42	54
high-6 hr	high	6 hr	42	60
high-6 hr	high	6 hr	42	35
high-6 hr	high	6 hr	42	41
high-6 hr	high	6 hr	42	52
low-0 hr	low	0 hr	42	20
low-0 hr	low	0 hr	42	31
low-0 hr	low	0 hr	42	31
low-0 hr	low	0 hr	42	28
low-0 hr	low	0 hr	42	21
low-0 hr	low	0 hr	42	20
low-0 hr	low	0 hr	42	28
low-0 hr	low	0 hr	42	33
low-0 hr	low	0 hr	42	36
low-3 hr	low	3 hr	42	1
low-3 hr	low	3 hr	42	2
low-3 hr	low	3 hr	42	0
low-3 hr	low	3 hr	42	6
low-3 hr	low	3 hr	42	2
low-3 hr	low	3 hr	42	3
low-3 hr	low	3 hr	42	2
low-3 hr	low	3 hr	42	4
low-3 hr	low	3 hr	42	1
low-6 hr	low	6 hr	42	4
low-6 hr	low	6 hr	42	3
low-6 hr	low	6 hr	42	10
low-6 hr	low	6 hr	42	3
low-6 hr	low	6 hr	42	6
low-6 hr	low	6 hr	42	4
low-6 hr	low	6 hr	42	8
low-6 hr	low	6 hr	42	3
low-6 hr	low	6 hr	42	5
high-0 hr	high	0 hr	56	155
high-0 hr	high	0 hr	56	99
high-0 hr	high	0 hr	56	89
high-0 hr	high	0 hr	56	83
high-0 hr	high	0 hr	56	70
high-0 hr	high	0 hr	56	107
high-0 hr	high	0 hr	56	101
high-0 hr	high	0 hr	56	101
high-0 hr	high	0 hr	56	95
high-3 hr	high	3 hr	56	30
high-3 hr	high	3 hr	56	52
high-3 hr	high	3 hr	56	56
high-3 hr	high	3 hr	56	56
high-3 hr	high	3 hr	56	47
high-3 hr	high	3 hr	56	46
high-3 hr	high	3 hr	56	56
high-3 hr	high	3 hr	56	54
high-3 hr	high	3 hr	56	44
high-6 hr	high	6 hr	56	80
high-6 hr	high	6 hr	56	62
high-6 hr	high	6 hr	56	33
high-6 hr	high	6 hr	56	60
high-6 hr	high	6 hr	56	48
high-6 hr	high	6 hr	56	56
high-6 hr	high	6 hr	56	44
high-6 hr	high	6 hr	56	36
high-6 hr	high	6 hr	56	34
low-0 hr	low	0 hr	56	52
low-0 hr	low	0 hr	56	40
low-0 hr	low	0 hr	56	19
low-0 hr	low	0 hr	56	32
low-0 hr	low	0 hr	56	36
low-0 hr	low	0 hr	56	40
low-0 hr	low	0 hr	56	31
low-0 hr	low	0 hr	56	51
low-0 hr	low	0 hr	56	17
low-3 hr	low	3 hr	56	0
low-3 hr	low	3 hr	56	1
low-3 hr	low	3 hr	56	2
low-3 hr	low	3 hr	56	1
low-3 hr	low	3 hr	56	2
low-3 hr	low	3 hr	56	2
low-3 hr	low	3 hr	56	3
low-3 hr	low	3 hr	56	4
low-3 hr	low	3 hr	56	6
low-6 hr	low	6 hr	56	2
low-6 hr	low	6 hr	56	3
low-6 hr	low	6 hr	56	3
low-6 hr	low	6 hr	56	1
low-6 hr	low	6 hr	56	0
low-6 hr	low	6 hr	56	6
low-6 hr	low	6 hr	56	2
low-6 hr	low	6 hr	56	0
low-6 hr	low	6 hr	56	1
high-0 hr	high	0 hr	70	80
high-0 hr	high	0 hr	70	80
high-0 hr	high	0 hr	70	74
high-0 hr	high	0 hr	70	95
high-0 hr	high	0 hr	70	118
high-0 hr	high	0 hr	70	121
high-0 hr	high	0 hr	70	97
high-0 hr	high	0 hr	70	109
high-0 hr	high	0 hr	70	89
high-3 hr	high	3 hr	70	62
high-3 hr	high	3 hr	70	60
high-3 hr	high	3 hr	70	86
high-3 hr	high	3 hr	70	53
high-3 hr	high	3 hr	70	64
high-3 hr	high	3 hr	70	64
high-3 hr	high	3 hr	70	54
high-3 hr	high	3 hr	70	56
high-3 hr	high	3 hr	70	43
high-6 hr	high	6 hr	70	48
high-6 hr	high	6 hr	70	47
high-6 hr	high	6 hr	70	39
high-6 hr	high	6 hr	70	45
high-6 hr	high	6 hr	70	44
high-6 hr	high	6 hr	70	28
high-6 hr	high	6 hr	70	47
high-6 hr	high	6 hr	70	41
high-6 hr	high	6 hr	70	37
low-0 hr	low	0 hr	70	34
low-0 hr	low	0 hr	70	50
low-0 hr	low	0 hr	70	44
low-0 hr	low	0 hr	70	52
low-0 hr	low	0 hr	70	34
low-0 hr	low	0 hr	70	35
low-0 hr	low	0 hr	70	58
low-0 hr	low	0 hr	70	56
low-0 hr	low	0 hr	70	57
low-3 hr	low	3 hr	70	5
low-3 hr	low	3 hr	70	6
low-3 hr	low	3 hr	70	7
low-3 hr	low	3 hr	70	4
low-3 hr	low	3 hr	70	5
low-3 hr	low	3 hr	70	5
low-3 hr	low	3 hr	70	3
low-3 hr	low	3 hr	70	18
low-3 hr	low	3 hr	70	14
low-6 hr	low	6 hr	70	7
low-6 hr	low	6 hr	70	3
low-6 hr	low	6 hr	70	8
low-6 hr	low	6 hr	70	13
low-6 hr	low	6 hr	70	4
low-6 hr	low	6 hr	70	2
low-6 hr	low	6 hr	70	3
low-6 hr	low	6 hr	70	4
low-6 hr	low	6 hr	70	6
high-0 hr	high	0 hr	84	94
high-0 hr	high	0 hr	84	94
high-0 hr	high	0 hr	84	117
high-0 hr	high	0 hr	84	76
high-0 hr	high	0 hr	84	104
high-0 hr	high	0 hr	84	77
high-0 hr	high	0 hr	84	62
high-0 hr	high	0 hr	84	77
high-0 hr	high	0 hr	84	82
high-3 hr	high	3 hr	84	46
high-3 hr	high	3 hr	84	46
high-3 hr	high	3 hr	84	83
high-3 hr	high	3 hr	84	41
high-3 hr	high	3 hr	84	79
high-3 hr	high	3 hr	84	64
high-3 hr	high	3 hr	84	64
high-3 hr	high	3 hr	84	28
high-3 hr	high	3 hr	84	56
high-6 hr	high	6 hr	84	33
high-6 hr	high	6 hr	84	25
high-6 hr	high	6 hr	84	54
high-6 hr	high	6 hr	84	46
high-6 hr	high	6 hr	84	63
high-6 hr	high	6 hr	84	41
high-6 hr	high	6 hr	84	38
high-6 hr	high	6 hr	84	27
high-6 hr	high	6 hr	84	43
low-0 hr	low	0 hr	84	54
low-0 hr	low	0 hr	84	34
low-0 hr	low	0 hr	84	30
low-0 hr	low	0 hr	84	50
low-0 hr	low	0 hr	84	43
low-0 hr	low	0 hr	84	45
low-0 hr	low	0 hr	84	49
low-0 hr	low	0 hr	84	47
low-0 hr	low	0 hr	84	39
low-3 hr	low	3 hr	84	8
low-3 hr	low	3 hr	84	2
low-3 hr	low	3 hr	84	5
low-3 hr	low	3 hr	84	11
low-3 hr	low	3 hr	84	2
low-3 hr	low	3 hr	84	4
low-3 hr	low	3 hr	84	12
low-3 hr	low	3 hr	84	18
low-3 hr	low	3 hr	84	5
low-6 hr	low	6 hr	84	4
low-6 hr	low	6 hr	84	3
low-6 hr	low	6 hr	84	7
low-6 hr	low	6 hr	84	11
low-6 hr	low	6 hr	84	7
low-6 hr	low	6 hr	84	9
low-6 hr	low	6 hr	84	3
low-6 hr	low	6 hr	84	2
low-6 hr	low	6 hr	84	1
high-0 hr	high	0 hr	98	88
high-0 hr	high	0 hr	98	119
high-0 hr	high	0 hr	98	127
high-0 hr	high	0 hr	98	80
high-0 hr	high	0 hr	98	73
high-0 hr	high	0 hr	98	79
high-0 hr	high	0 hr	98	71
high-0 hr	high	0 hr	98	88
high-0 hr	high	0 hr	98	117
high-3 hr	high	3 hr	98	88
high-3 hr	high	3 hr	98	75
high-3 hr	high	3 hr	98	87
high-3 hr	high	3 hr	98	47
high-3 hr	high	3 hr	98	59
high-3 hr	high	3 hr	98	36
high-3 hr	high	3 hr	98	39
high-3 hr	high	3 hr	98	66
high-3 hr	high	3 hr	98	51
high-6 hr	high	6 hr	98	50
high-6 hr	high	6 hr	98	65
high-6 hr	high	6 hr	98	52
high-6 hr	high	6 hr	98	65
high-6 hr	high	6 hr	98	83
high-6 hr	high	6 hr	98	73
high-6 hr	high	6 hr	98	46
high-6 hr	high	6 hr	98	54
high-6 hr	high	6 hr	98	55
low-0 hr	low	0 hr	98	34
low-0 hr	low	0 hr	98	21
low-0 hr	low	0 hr	98	37
low-0 hr	low	0 hr	98	50
low-0 hr	low	0 hr	98	34
low-0 hr	low	0 hr	98	24
low-0 hr	low	0 hr	98	35
low-0 hr	low	0 hr	98	38
low-0 hr	low	0 hr	98	27
low-3 hr	low	3 hr	98	9
low-3 hr	low	3 hr	98	4
low-3 hr	low	3 hr	98	3
low-3 hr	low	3 hr	98	9
low-3 hr	low	3 hr	98	3
low-3 hr	low	3 hr	98	3
low-3 hr	low	3 hr	98	5
low-3 hr	low	3 hr	98	7
low-3 hr	low	3 hr	98	3
low-6 hr	low	6 hr	98	3
low-6 hr	low	6 hr	98	3
low-6 hr	low	6 hr	98	4
low-6 hr	low	6 hr	98	2
low-6 hr	low	6 hr	98	3
low-6 hr	low	6 hr	98	7
low-6 hr	low	6 hr	98	6
low-6 hr	low	6 hr	98	3
low-6 hr	low	6 hr	98	4
high-0 hr	high	0 hr	112	87
high-0 hr	high	0 hr	112	97
high-0 hr	high	0 hr	112	97
high-0 hr	high	0 hr	112	110
high-0 hr	high	0 hr	112	77
high-0 hr	high	0 hr	112	83
high-0 hr	high	0 hr	112	67
high-0 hr	high	0 hr	112	97
high-0 hr	high	0 hr	112	98
high-3 hr	high	3 hr	112	71
high-3 hr	high	3 hr	112	70
high-3 hr	high	3 hr	112	84
high-3 hr	high	3 hr	112	68
high-3 hr	high	3 hr	112	47
high-3 hr	high	3 hr	112	59
high-3 hr	high	3 hr	112	68
high-3 hr	high	3 hr	112	68
high-3 hr	high	3 hr	112	58
high-6 hr	high	6 hr	112	52
high-6 hr	high	6 hr	112	69
high-6 hr	high	6 hr	112	44
high-6 hr	high	6 hr	112	56
high-6 hr	high	6 hr	112	73
high-6 hr	high	6 hr	112	47
high-6 hr	high	6 hr	112	63
high-6 hr	high	6 hr	112	63
high-6 hr	high	6 hr	112	58
low-0 hr	low	0 hr	112	22
low-0 hr	low	0 hr	112	22
low-0 hr	low	0 hr	112	43
low-0 hr	low	0 hr	112	26
low-0 hr	low	0 hr	112	59
low-0 hr	low	0 hr	112	38
low-0 hr	low	0 hr	112	28
low-0 hr	low	0 hr	112	37
low-0 hr	low	0 hr	112	42
low-3 hr	low	3 hr	112	11
low-3 hr	low	3 hr	112	5
low-3 hr	low	3 hr	112	6
low-3 hr	low	3 hr	112	13
low-3 hr	low	3 hr	112	8
low-3 hr	low	3 hr	112	9
low-3 hr	low	3 hr	112	6
low-3 hr	low	3 hr	112	3
low-3 hr	low	3 hr	112	3
low-6 hr	low	6 hr	112	2
low-6 hr	low	6 hr	112	4
low-6 hr	low	6 hr	112	5
low-6 hr	low	6 hr	112	6
low-6 hr	low	6 hr	112	1
low-6 hr	low	6 hr	112	3
low-6 hr	low	6 hr	112	2
low-6 hr	low	6 hr	112	6
low-6 hr	low	6 hr	112	4

## Sheet: buoyant weight
					All wet weight (Ww) and air weight (Wo) values are presented in grams (g).
treatment	light	food	tank	nubbin	Ww-0	Wo-0	Ww-14	Wo-14	Ww-28	Wo-28	Ww-42	Wo-42	Ww-56	Wo-56	Ww-70	Wo-70	Ww-84	Wo-84	Ww-98	Wo-98	Ww-112	Wo-112	SGR %/day	BW mg/g/week
HLHF	high	high	1	PA4-17	5.14133	7.88746	5.30803	8.1473	5.54283	8.5077	5.86323	9.00699	6.21523	9.5478	6.57633	10.1002	7.12463	10.9448	7.75433	11.9166	8.67743	13.3404	0.418943	93.2591
HLHF	high	high	1	PA4-9	8.14813	12.5003	8.22283	12.6212	8.48763	13.0277	9.05603	13.9117	9.60683	14.758	10.6236	16.3162	10.94	16.8059	11.8621	18.2293	13.0057	19.9946	0.37445	85.0223
HLHF	high	high	1	PA2-9	6.74773	10.3519	6.88073	10.5612	7.19823	11.0486	7.74393	11.8961	8.22133	12.6296	8.64793	13.2818	9.17233	14.0904	9.85743	15.1485	10.8073	16.6148	0.377174	85.5134
HLHF	high	high	1	PA5-6	9.85153	15.1135	10.1194	15.5323	10.5639	16.2146	11.2082	17.2179	11.7505	18.0511	12.3584	18.9805	12.8995	19.8161	13.9411	21.4242	15.1603	23.307	0.345315	79.8725
HLHF	high	high	1	PA2-19	5.01203	7.68909	5.06373	7.77233	5.35253	8.21561	5.83083	8.95722	6.24783	9.59788	7.20593	11.0671	7.20173	11.0632	7.76773	11.9372	8.48793	13.049	0.421645	93.7745
LLHF	low	high	1	PA5-1	12.0966	18.5578	12.4133	19.0532	13.1261	20.1473	13.8754	21.3152	14.6005	22.4293	15.3632	23.5954	16.2393	24.9467	17.1061	26.288	18.5103	28.4571	0.340809	79.0926
LLHF	low	high	1	PA2-18	3.70523	5.6843	3.88313	5.96022	4.99433	7.6658	5.43363	8.34705	7.24603	11.1313	7.00413	10.7572	6.99393	10.744	7.44513	11.4414	8.64823	13.2955	0.677389	151.363
LLHF	low	high	1	PA4-3	10.9121	16.7406	11.0759	17.0005	11.4662	17.5995	12.1714	18.6975	12.8025	19.6672	13.5677	20.8378	14.2607	21.9072	15.03	23.0976	16.6235	25.5564	0.337255	78.4807
LLHF	low	high	1	PA5-5	8.45703	12.9742	8.63413	13.2525	9.01933	13.8438	9.48573	14.5718	10.0425	15.4273	10.5917	16.2672	10.8206	16.6225	11.5402	17.7346	12.8723	19.7895	0.336567	78.3626
LLHF	low	high	1	PA2-12	5.15343	7.90602	5.28863	8.11753	5.64153	8.65919	6.06563	9.31792	6.58473	10.1154	6.43213	9.8787	7.96553	12.2366	8.42463	12.9467	9.41933	14.4809	0.482469	105.846
HLLF	high	low	1	PA2-1	3.01103	4.61931	3.10373	4.76392	3.30513	5.07305	3.67813	5.65028	4.04943	6.22072	4.41713	6.78399	4.94103	7.59036	5.37163	8.25492	6.54283	10.0587	0.620372	136.878
HLLF	high	low	1	PA2-5	5.16873	7.92949	5.29843	8.13257	5.62123	8.62803	6.12053	9.40225	6.54333	10.0518	7.02013	10.7818	7.63703	11.7319	8.37123	12.8646	9.48333	14.5793	0.485504	106.472
HLLF	high	low	1	PA2-13	3.07373	4.7155	3.16603	4.85955	3.43223	5.26814	3.88103	5.96197	4.23423	6.5046	4.67743	7.18377	5.29473	8.13371	6.04583	9.291	8.03473	12.3523	0.767689	176.53
HLLF	high	low	1	PA4-2	14.1716	21.7411	14.4061	22.112	14.9757	22.9863	15.8589	24.3622	16.701	25.656	17.4659	26.8248	18.6115	28.5908	20.028	30.7783	22.0563	33.9086	0.354325	81.4451
HLLF	high	low	1	PA5-3	6.18273	9.4851	6.38333	9.79778	6.74773	10.3571	7.32273	11.2491	7.78073	11.9527	8.31503	12.7705	9.08373	13.9543	9.99913	15.3663	11.2463	17.2897	0.478627	105.056
LLLF	low	low	1	PA4-7	4.53203	6.95271	4.76293	7.31063	3.91563	6.01011	4.15143	6.37736	6.56173	10.0801	7.89483	12.1252	6.54203	10.0498	6.47013	9.94305	7.67173	11.7942	0.421301	93.7087
LLLF	low	low	1	PA1-9	4.19613	6.4374	4.31133	6.61747	4.34823	6.67411	5.31303	8.16179	6.11443	9.39296	6.38853	9.81174	7.18943	11.0443	8.04513	12.3634	9.89433	15.2112	0.685513	153.512
LLLF	low	low	1	PA5-10	8.82313	13.5358	9.03213	13.8634	9.54293	14.6475	10.315	15.8458	11.0875	17.0326	11.6845	17.9455	12.572	19.313	13.5951	20.8925	15.8816	24.4159	0.47026	103.348
LLLF	low	low	1	PA1-5	9.86807	15.1389	10.0148	15.3718	14.919	22.8992	15.576	23.9276	16.705	25.6622	16.8665	25.9042	17.6846	27.1669	18.2031	27.9739	19.9347	30.6469	0.562235	123.139
LLLF	low	low	1	PA2-4	4.96613	7.61868	5.08133	7.79934	5.23353	8.03295	5.58583	8.58086	5.90283	9.0679	6.20493	9.52976	6.69813	10.2896	6.49163	9.97609	7.92803	12.1883	0.374579	85.0456
HLHF	high	high	2	PA5-8	7.54753	11.5789	7.69333	11.8085	7.84523	12.0417	8.13603	12.4984	8.35063	12.8282	8.58873	13.1909	8.86153	13.613	8.89513	13.6697	9.00573	13.8451	0.142497	48.7945
HLHF	high	high	2	PA4-5	7.30023	11.1995	7.38063	11.3285	7.50903	11.5256	7.78233	11.9551	8.02763	12.332	8.34063	12.8098	8.72903	13.4094	8.82453	13.5612	9.01823	13.8643	0.170161	52.5824
HLHF	high	high	2	PA4-12	5.30373	8.1366	5.35473	8.21898	5.41453	8.31077	5.55763	8.53754	5.68053	8.7264	5.80663	8.91804	6.00303	9.22179	6.42923	9.8802	6.86003	10.5464	0.2068	57.8059
HLHF	high	high	2	PA4-10	6.66183	10.2201	6.77063	10.3922	7.07953	10.8664	7.16003	10.9991	7.14713	10.9794	7.31623	11.2365	7.56063	11.6146	7.76296	11.9298	7.79193	11.979	0.126597	46.676
HLHF	high	high	2	PA4-18	3.06463	4.70154	3.32643	5.10574	3.45943	5.30989	3.72983	5.7297	3.95903	6.08184	4.02663	6.18425	4.37533	6.72133	6.10513	9.38213	4.62843	7.11559	0.330356	77.3006
LLHF	low	high	2	PA1-3	5.12643	7.8646	5.21233	8.00041	5.33733	8.19228	5.63483	8.65613	5.88093	9.03425	6.08003	9.33794	6.51713	10.0115	6.39383	9.82579	6.75593	10.3863	0.221715	60.002
LLHF	low	high	2	PA4-11	12.7601	19.5757	12.89	19.7849	13.0965	20.1019	13.3657	20.5322	13.9903	21.4919	13.7783	21.1613	13.9533	21.4349	13.8862	21.3398	14.2862	21.9545	0.104488	42.1378
LLHF	low	high	2	PA5-7	9.14033	14.0224	9.20803	14.1334	9.01983	13.8445	9.38313	14.4142	9.63643	14.8034	9.96523	15.305	10.3257	15.8623	12.3977	19.0524	13.2647	20.3927	0.298565	71.9924
LLHF	low	high	2	PA4-8	3.94073	6.04558	4.01713	6.1659	4.14413	6.36083	4.28323	6.57983	4.61383	7.08774	4.63463	7.11804	4.78153	7.34533	4.81963	7.40662	5.01843	7.71516	0.194403	56.0116
LLHF	low	high	2	PA4-14	2.75963	4.23363	2.81183	4.31588	2.86753	4.40138	2.96443	4.55391	3.07213	4.71939	3.09543	4.75408	3.28333	5.04382	3.60083	5.53362	3.62653	5.5753	0.219458	59.667
HLLF	high	low	2	PA5-2	13.6347	20.9174	13.8042	21.1881	14.1007	21.6432	14.6194	22.4581	14.97	22.9969	15.3698	23.6055	15.8846	24.4018	16.131	24.7895	16.1863	24.8843	0.138437	48.2495
HLLF	high	low	2	PA5-4	7.67233	11.7703	7.80063	11.9732	7.98693	12.2591	8.28333	12.7247	9.25563	14.2184	9.63903	14.804	9.07933	13.9476	9.35383	14.3746	9.39953	14.4505	0.163542	51.6641
HLLF	high	low	2	PA1-8	4.91983	7.54765	4.96853	7.6262	5.03933	7.73488	5.22053	8.01969	5.35323	8.22361	5.53703	8.50398	5.76673	8.85879	5.87503	9.02852	6.04603	9.29496	0.166004	52.0048
HLLF	high	low	2	PA4-13	4.98983	7.65504	5.05313	7.75606	5.17243	7.93917	5.39553	8.28852	5.57703	8.56741	5.84263	8.97333	6.14083	9.43347	6.38383	9.81043	6.61593	10.1711	0.226552	60.7231
HLLF	high	low	2	PA1-7	8.20653	12.5899	8.32133	12.7724	8.55853	13.1365	8.97873	13.793	9.04913	13.9012	9.57853	14.7111	10.0046	15.369	10.3853	15.9598	10.4932	16.1319	0.197631	56.4761
LLLF	low	low	2	PA1-4	9.92373	15.2243	10.0473	15.4217	10.2399	15.7173	10.7655	16.5378	10.8468	16.6628	10.9058	16.7496	11.2565	17.2922	11.295	17.3578	11.2994	17.3713	0.105175	43.888
LLLF	low	low	2	PA4-19	7.27713	11.164	7.31203	11.2232	7.38793	11.3397	7.62483	11.7131	8.88783	13.6534	8.93193	13.718	8.47123	13.0134	8.49193	13.0501	8.66743	13.325	0.141059	48.6011
LLLF	low	low	2	PA4-6	5.96873	9.15679	6.04373	9.27653	6.19153	9.50339	6.45123	9.91027	6.67203	10.2495	6.85363	10.5261	7.14963	10.9832	7.57753	11.6449	7.92333	12.181	0.227508	60.8661
LLLF	low	low	2	PA5-9	5.11123	7.84128	5.21013	7.99704	5.35503	8.21944	5.53793	8.50727	5.67503	8.71795	5.91923	9.09097	6.10393	9.37679	6.24423	9.5959	6.34343	9.75217	0.173858	53.0987
LLLF	low	low	2	PA1-1	7.95213	12.1996	8.02723	12.321	8.19083	12.5721	8.36363	12.8481	8.96623	13.7739	8.78713	13.4956	9.16853	14.0846	9.35703	14.3795	9.52153	14.6381	0.145268	49.168
HLHF	high	high	3	PA4-4	9.95733	15.2758	10.126	15.5425	10.4536	16.0453	11.0891	17.0349	11.6049	17.8274	12.2607	18.8305	12.9076	19.8286	13.5477	20.8196	13.8677	21.3198	0.265756	66.7317
HLHF	high	high	3	PA2-3	4.56043	6.99628	4.66903	7.1665	4.90343	7.52628	5.45523	8.38023	5.95433	9.14701	6.29633	9.67014	7.14093	10.9698	7.64093	11.7423	8.16093	12.5463	0.4656	102.405
HLHF	high	high	3	PA2-15	2.39643	3.67643	2.42843	3.7274	2.53583	3.89225	2.9935	4.59856	3.09053	4.74766	3.50893	5.38915	3.55463	5.46059	3.76723	5.78934	4.03003	6.19563	0.416057	92.7108
HLHF	high	high	3	PA2-16	3.98913	6.11984	4.09233	6.28132	4.29313	6.58953	4.74023	7.28186	5.08303	7.80853	5.45633	8.38003	5.84023	8.97169	6.13733	9.43162	6.45483	9.92343	0.385334	86.9951
HLHF	high	high	3	PA2-7	7.69773	11.8093	7.84743	12.045	8.17873	12.5535	8.81003	13.5338	9.32413	14.3237	9.90073	15.2059	9.83953	15.1154	10.9536	16.8331	11.3303	17.4189	0.309842	73.8511
LLHF	low	high	3	PA5-11	9.98933	15.3249	10.3266	15.8504	10.477	16.0812	11.0489	16.9732	11.5777	17.7856	12.0782	18.5502	12.5897	19.3402	13.0103	19.9938	15.2596	23.4596	0.339446	78.8577
LLHF	low	high	3	PA2-9	5.07043	7.77869	5.20413	7.98783	5.37443	8.24922	5.67063	8.71113	5.99793	9.21399	6.47293	9.94137	6.57223	10.0962	6.72453	10.334	6.88923	10.5913	0.246047	63.6741
LLHF	low	high	3	PA2-17	4.74793	7.28393	4.83513	7.42145	5.04253	7.73979	5.46283	8.39191	5.88763	9.04455	6.27713	9.64065	6.62663	10.1798	6.94203	10.6682	7.11563	10.9393	0.324213	76.2583
LLHF	low	high	3	PA2-20	9.54703	14.6464	9.72203	14.9224	9.98583	15.3273	10.5644	16.2289	11.0509	16.9764	12.2694	18.8438	11.875	18.2423	12.3458	18.9726	12.6379	19.4291	0.225272	60.5318
LLHF	low	high	3	PA2-14	2.10283	3.22601	2.16533	3.32357	2.27363	3.4898	2.51013	3.85602	2.87813	4.42137	3.02113	4.63997	3.16023	4.85471	3.36793	5.17571	3.50533	5.38897	0.409047	91.3872
HLLF	high	low	3	PA4-16	1.72203	2.64182	1.71913	2.6387	1.97673	3.03409	2.04163	3.13632	2.28453	3.50949	2.56253	3.93563	2.75503	4.23225	3.01853	4.63876	3.05513	4.69685	0.458726	101.024
HLLF	high	low	3	PA1-11	4.04623	6.20743	4.24623	6.51755	4.85133	7.44631	5.41443	8.31756	8.91053	13.6883	9.64523	14.8135	9.88353	15.183	10.9401	16.8124	11.2892	17.3557	0.819652	192.359
HLLF	high	low	3	PA2-8	3.39683	5.21117	3.46663	5.32094	3.70663	5.68931	4.59713	7.06203	4.54773	6.9862	5.27143	8.09606	5.45793	8.38441	5.87333	9.02591	6.30673	9.69575	0.494964	108.441
HLLF	high	low	3	PA4-20	3.02993	4.6483	3.06563	4.70544	3.15473	4.8422	3.31493	5.09234	3.49073	5.36244	3.64523	5.59848	3.93703	6.04802	4.19893	6.45276	9.0942	13.9811	0.877874	211.364
HLLF	high	low	3	PA2-11	4.19883	6.44154	4.24623	6.51755	4.48293	6.88086	4.96823	7.63211	5.34373	8.20901	5.75703	8.84186	6.30653	9.68802	6.88673	10.5833	7.23303	11.1198	0.435236	96.3923
LLLF	low	low	3	PA2-6	3.68933	5.6599	3.77333	5.79169	4.03703	6.19644	4.59713	7.06203	5.07143	7.79071	5.62083	8.63268	6.17503	9.48601	6.81113	10.4671	7.05913	10.8525	0.518961	113.543
LLLF	low	low	3	PA1-2	8.35343	12.8152	8.64993	13.2768	8.67803	13.3199	9.15673	14.0664	9.60353	14.7529	10.0361	15.4139	10.3927	15.9652	10.5166	16.1616	11.6703	17.9416	0.268244	67.1232
LLLF	low	low	3	PA2-10	6.49003	9.95653	6.59723	10.1261	6.80763	10.449	7.14113	10.9701	7.51273	11.541	8.84903	13.5907	8.17593	12.5598	9.13413	14.037	10.668	16.4007	0.397873	89.3013
LLLF	low	low	3	PA2	16.6953	25.6128	16.376	25.1356	17.0967	26.2418	17.6018	27.0396	18.0315	27.6999	19.0361	29.2364	19.1381	29.3998	19.2478	29.5793	19.5495	30.0548	0.127496	46.7947
LLLF	low	low	3	PA4-1	2.61703	4.01486	2.66703	4.09363	2.77373	4.2574	2.95923	4.54592	3.16543	4.86272	3.31613	5.09304	3.53103	5.42433	3.68943	5.66978	3.80103	5.84357	0.299219	72.0994

## Sheet: SGR
treatment	light	food	tank	nubbin	day	SGR (%/day)
HLHF	high	high	1	PA4-17	14	0.231523
HLHF	high	high	1	PA4-17	28	0.270349
HLHF	high	high	1	PA4-17	42	0.316018
HLHF	high	high	1	PA4-17	56	0.341138
HLHF	high	high	1	PA4-17	70	0.353255
HLHF	high	high	1	PA4-17	84	0.389987
HLHF	high	high	1	PA4-17	98	0.421077
HLHF	high	high	1	PA4-17	112	0.469216
HLHF	high	high	1	PA4-9	14	0.0687879
HLHF	high	high	1	PA4-9	28	0.147592
HLHF	high	high	1	PA4-9	42	0.254717
HLHF	high	high	1	PA4-9	56	0.296487
HLHF	high	high	1	PA4-9	70	0.38058
HLHF	high	high	1	PA4-9	84	0.352361
HLHF	high	high	1	PA4-9	98	0.384978
HLHF	high	high	1	PA4-9	112	0.419384
HLHF	high	high	1	PA2-9	14	0.143021
HLHF	high	high	1	PA2-9	28	0.232619
HLHF	high	high	1	PA2-9	42	0.331053
HLHF	high	high	1	PA2-9	56	0.355129
HLHF	high	high	1	PA2-9	70	0.356039
HLHF	high	high	1	PA2-9	84	0.367057
HLHF	high	high	1	PA2-9	98	0.388505
HLHF	high	high	1	PA2-9	112	0.422434
HLHF	high	high	1	PA5-6	14	0.195249
HLHF	high	high	1	PA5-6	28	0.251153
HLHF	high	high	1	PA5-6	42	0.310382
HLHF	high	high	1	PA5-6	56	0.317175
HLHF	high	high	1	PA5-6	70	0.325465
HLHF	high	high	1	PA5-6	84	0.322508
HLHF	high	high	1	PA5-6	98	0.356053
HLHF	high	high	1	PA5-6	112	0.386753
HLHF	high	high	1	PA2-19	14	0.0769047
HLHF	high	high	1	PA2-19	28	0.236545
HLHF	high	high	1	PA2-19	42	0.36347
HLHF	high	high	1	PA2-19	56	0.395964
HLHF	high	high	1	PA2-19	70	0.520253
HLHF	high	high	1	PA2-19	84	0.433122
HLHF	high	high	1	PA2-19	98	0.448829
HLHF	high	high	1	PA2-19	112	0.472243
LLHF	low	high	2	PA5-1	14	0.188202
LLHF	low	high	2	PA5-1	28	0.293508
LLHF	low	high	2	PA5-1	42	0.329837
LLHF	low	high	2	PA5-1	56	0.338353
LLHF	low	high	2	PA5-1	70	0.343091
LLHF	low	high	2	PA5-1	84	0.352205
LLHF	low	high	2	PA5-1	98	0.355332
LLHF	low	high	2	PA5-1	112	0.381706
LLHF	low	high	2	PA2-18	14	0.338575
LLHF	low	high	2	PA2-18	28	1.06808
LLHF	low	high	2	PA2-18	42	0.914764
LLHF	low	high	2	PA2-18	56	1.2001
LLHF	low	high	2	PA2-18	70	0.91124
LLHF	low	high	2	PA2-18	84	0.757904
LLHF	low	high	2	PA2-18	98	0.713806
LLHF	low	high	2	PA2-18	112	0.758676
LLHF	low	high	2	PA4-3	14	0.110026
LLHF	low	high	2	PA4-3	28	0.178698
LLHF	low	high	2	PA4-3	42	0.263227
LLHF	low	high	2	PA4-3	56	0.287704
LLHF	low	high	2	PA4-3	70	0.312761
LLHF	low	high	2	PA4-3	84	0.320211
LLHF	low	high	2	PA4-3	98	0.32846
LLHF	low	high	2	PA4-3	112	0.377725
LLHF	low	high	2	PA5-5	14	0.151637
LLHF	low	high	2	PA5-5	28	0.231701
LLHF	low	high	2	PA5-5	42	0.276499
LLHF	low	high	2	PA5-5	56	0.309246
LLHF	low	high	2	PA5-5	70	0.323127
LLHF	low	high	2	PA5-5	84	0.294999
LLHF	low	high	2	PA5-5	98	0.318935
LLHF	low	high	2	PA5-5	112	0.376955
LLHF	low	high	2	PA2-12	14	0.188579
LLHF	low	high	2	PA2-12	28	0.32499
LLHF	low	high	2	PA2-12	42	0.391226
LLHF	low	high	2	PA2-12	56	0.440067
LLHF	low	high	2	PA2-12	70	0.318224
LLHF	low	high	2	PA2-12	84	0.520004
LLHF	low	high	2	PA2-12	98	0.503278
LLHF	low	high	2	PA2-12	112	0.540366
HLLF	high	low	3	PA2-1	14	0.220191
HLLF	high	low	3	PA2-1	28	0.334635
HLLF	high	low	3	PA2-1	42	0.479669
HLLF	high	low	3	PA2-1	56	0.531501
HLLF	high	low	3	PA2-1	70	0.54903
HLLF	high	low	3	PA2-1	84	0.591231
HLLF	high	low	3	PA2-1	98	0.592413
HLLF	high	low	3	PA2-1	112	0.694817
HLLF	high	low	3	PA2-5	14	0.180628
HLLF	high	low	3	PA2-5	28	0.301528
HLLF	high	low	3	PA2-5	42	0.40562
HLLF	high	low	3	PA2-5	56	0.42351
HLLF	high	low	3	PA2-5	70	0.438955
HLLF	high	low	3	PA2-5	84	0.466339
HLLF	high	low	3	PA2-5	98	0.493765
HLLF	high	low	3	PA2-5	112	0.543765
HLLF	high	low	3	PA2-13	14	0.214935
HLLF	high	low	3	PA2-13	28	0.395795
HLLF	high	low	3	PA2-13	42	0.558446
HLLF	high	low	3	PA2-13	56	0.574386
HLLF	high	low	3	PA2-13	70	0.601386
HLLF	high	low	3	PA2-13	84	0.649003
HLLF	high	low	3	PA2-13	98	0.692033
HLLF	high	low	3	PA2-13	112	0.859812
HLLF	high	low	3	PA4-2	14	0.120829
HLLF	high	low	3	PA4-2	28	0.198904
HLLF	high	low	3	PA4-2	42	0.271023
HLLF	high	low	3	PA4-2	56	0.29567
HLLF	high	low	3	PA4-2	70	0.300177
HLLF	high	low	3	PA4-2	84	0.32605
HLLF	high	low	3	PA4-2	98	0.3547
HLLF	high	low	3	PA4-2	112	0.396844
HLLF	high	low	3	PA5-3	14	0.231674
HLLF	high	low	3	PA5-3	28	0.396544
HLLF	high	low	3	PA5-3	42	0.4061
HLLF	high	low	3	PA5-3	56	0.412923
HLLF	high	low	3	PA5-3	70	0.424883
HLLF	high	low	3	PA5-3	84	0.459604
HLLF	high	low	3	PA5-3	98	0.4923
HLLF	high	low	3	PA5-3	112	0.536063
LLLF	low	low	4	PA4-7	14	0.358553
LLLF	low	low	4	PA4-7	28	-0.520319
LLLF	low	low	4	PA4-7	42	-0.205662
LLLF	low	low	4	PA4-7	56	0.663269
LLLF	low	low	4	PA4-7	70	0.794502
LLLF	low	low	4	PA4-7	84	0.438595
LLLF	low	low	4	PA4-7	98	0.365043
LLLF	low	low	4	PA4-7	112	0.471857
LLLF	low	low	4	PA1-9	14	0.197058
LLLF	low	low	4	PA1-9	28	0.128966
LLLF	low	low	4	PA1-9	42	0.565091
LLLF	low	low	4	PA1-9	56	0.674706
LLLF	low	low	4	PA1-9	70	0.602079
LLLF	low	low	4	PA1-9	84	0.642609
LLLF	low	low	4	PA1-9	98	0.665938
LLLF	low	low	4	PA1-9	112	0.767774
LLLF	low	low	4	PA5-10	14	0.170828
LLLF	low	low	4	PA5-10	28	0.281886
LLLF	low	low	4	PA5-10	42	0.375153
LLLF	low	low	4	PA5-10	56	0.410341
LLLF	low	low	4	PA5-10	70	0.402861
LLLF	low	low	4	PA5-10	84	0.423144
LLLF	low	low	4	PA5-10	98	0.442909
LLLF	low	low	4	PA5-10	112	0.526691
LLLF	low	low	4	PA1-5	14	0.109055
LLLF	low	low	4	PA1-5	28	1.47799
LLLF	low	low	4	PA1-5	42	1.08992
LLLF	low	low	4	PA1-5	56	0.942416
LLLF	low	low	4	PA1-5	70	0.767345
LLLF	low	low	4	PA1-5	84	0.696113
LLLF	low	low	4	PA1-5	98	0.626536
LLLF	low	low	4	PA1-5	112	0.629703
LLLF	low	low	4	PA2-4	14	0.167403
LLLF	low	low	4	PA2-4	28	0.189105
LLLF	low	low	4	PA2-4	42	0.283169
LLLF	low	low	4	PA2-4	56	0.31096
LLLF	low	low	4	PA2-4	70	0.319738
LLLF	low	low	4	PA2-4	84	0.357774
LLLF	low	low	4	PA2-4	98	0.27509
LLLF	low	low	4	PA2-4	112	0.419528
HLHF	high	high	5	PA5-8	14	0.140269
HLHF	high	high	5	PA5-8	28	0.0698285
HLHF	high	high	5	PA5-8	42	0.181955
HLHF	high	high	5	PA5-8	56	0.18297
HLHF	high	high	5	PA5-8	70	0.186206
HLHF	high	high	5	PA5-8	84	0.192669
HLHF	high	high	5	PA5-8	98	0.169387
HLHF	high	high	5	PA5-8	112	0.159597
HLHF	high	high	5	PA4-5	14	0.0818391
HLHF	high	high	5	PA4-5	28	0.0615975
HLHF	high	high	5	PA4-5	42	0.15545
HLHF	high	high	5	PA4-5	56	0.172018
HLHF	high	high	5	PA4-5	70	0.191924
HLHF	high	high	5	PA4-5	84	0.214394
HLHF	high	high	5	PA4-5	98	0.19525
HLHF	high	high	5	PA4-5	112	0.190581
HLHF	high	high	5	PA4-12	14	0.071959
HLHF	high	high	5	PA4-12	28	0.075643
HLHF	high	high	5	PA4-12	42	0.114525
HLHF	high	high	5	PA4-12	56	0.124966
HLHF	high	high	5	PA4-12	70	0.131005
HLHF	high	high	5	PA4-12	84	0.149043
HLHF	high	high	5	PA4-12	98	0.198123
HLHF	high	high	5	PA4-12	112	0.231616
HLHF	high	high	5	PA4-10	14	0.119316
HLHF	high	high	5	PA4-10	28	0.218991
HLHF	high	high	5	PA4-10	42	0.174902
HLHF	high	high	5	PA4-10	56	0.12797
HLHF	high	high	5	PA4-10	70	0.135449
HLHF	high	high	5	PA4-10	84	0.152265
HLHF	high	high	5	PA4-10	98	0.157842
HLHF	high	high	5	PA4-10	112	0.141788
HLHF	high	high	5	PA4-18	14	0.589122
HLHF	high	high	5	PA4-18	28	0.434576
HLHF	high	high	5	PA4-18	42	0.470892
HLHF	high	high	5	PA4-18	56	0.459676
HLHF	high	high	5	PA4-18	70	0.391595
HLHF	high	high	5	PA4-18	84	0.425473
HLHF	high	high	5	PA4-18	98	0.705018
HLHF	high	high	5	PA4-18	112	0.369999
LLHF	low	high	6	PA1-3	14	0.122298
LLHF	low	high	6	PA1-3	28	0.0846376
LLHF	low	high	6	PA1-3	42	0.228325
LLHF	low	high	6	PA1-3	56	0.247593
LLHF	low	high	6	PA1-3	70	0.245305
LLHF	low	high	6	PA1-3	84	0.287342
LLHF	low	high	6	PA1-3	98	0.227183
LLHF	low	high	6	PA1-3	112	0.248321
LLHF	low	high	6	PA4-11	14	0.07595
LLHF	low	high	6	PA4-11	28	0.0567613
LLHF	low	high	6	PA4-11	42	0.113589
LLHF	low	high	6	PA4-11	56	0.166764
LLHF	low	high	6	PA4-11	70	0.111265
LLHF	low	high	6	PA4-11	84	0.108019
LLHF	low	high	6	PA4-11	98	0.0880489
LLHF	low	high	6	PA4-11	112	0.117027
LLHF	low	high	6	PA5-7	14	0.0563126
LLHF	low	high	6	PA5-7	28	-0.0737516
LLHF	low	high	6	PA5-7	42	0.0656092
LLHF	low	high	6	PA5-7	56	0.0967874
LLHF	low	high	6	PA5-7	70	0.125028
LLHF	low	high	6	PA5-7	84	0.146768
LLHF	low	high	6	PA5-7	98	0.312788
LLHF	low	high	6	PA5-7	112	0.334393
LLHF	low	high	6	PA4-8	14	0.140757
LLHF	low	high	6	PA4-8	28	0.111161
LLHF	low	high	6	PA4-8	42	0.20162
LLHF	low	high	6	PA4-8	56	0.283998
LLHF	low	high	6	PA4-8	70	0.233291
LLHF	low	high	6	PA4-8	84	0.23183
LLHF	low	high	6	PA4-8	98	0.207191
LLHF	low	high	6	PA4-8	112	0.217731
LLHF	low	high	6	PA4-14	14	0.137451
LLHF	low	high	6	PA4-14	28	0.138781
LLHF	low	high	6	PA4-14	42	0.173636
LLHF	low	high	6	PA4-14	56	0.193966
LLHF	low	high	6	PA4-14	70	0.165634
LLHF	low	high	6	PA4-14	84	0.208457
LLHF	low	high	6	PA4-14	98	0.273248
LLHF	low	high	6	PA4-14	112	0.245793
HLLF	high	low	7	PA5-2	14	0.0918513
HLLF	high	low	7	PA5-2	28	0.0758982
HLLF	high	low	7	PA5-2	42	0.169215
HLLF	high	low	7	PA5-2	56	0.169244
HLLF	high	low	7	PA5-2	70	0.172714
HLLF	high	low	7	PA5-2	84	0.183422
HLLF	high	low	7	PA5-2	98	0.173306
HLLF	high	low	7	PA5-2	112	0.155049
HLLF	high	low	7	PA5-4	14	0.12206
HLLF	high	low	7	PA5-4	28	0.0842927
HLLF	high	low	7	PA5-4	42	0.185628
HLLF	high	low	7	PA5-4	56	0.337426
HLLF	high	low	7	PA5-4	70	0.327591
HLLF	high	low	7	PA5-4	84	0.202051
HLLF	high	low	7	PA5-4	98	0.20396
HLLF	high	low	7	PA5-4	112	0.183167
HLLF	high	low	7	PA1-8	14	0.0739598
HLLF	high	low	7	PA1-8	28	0.0505325
HLLF	high	low	7	PA1-8	42	0.144438
HLLF	high	low	7	PA1-8	56	0.153166
HLLF	high	low	7	PA1-8	70	0.170426
HLLF	high	low	7	PA1-8	84	0.190683
HLLF	high	low	7	PA1-8	98	0.182809
HLLF	high	low	7	PA1-8	112	0.185925
HLLF	high	low	7	PA4-13	14	0.0936452
HLLF	high	low	7	PA4-13	28	0.130161
HLLF	high	low	7	PA4-13	42	0.141978
HLLF	high	low	7	PA4-13	56	0.201074
HLLF	high	low	7	PA4-13	70	0.22699
HLLF	high	low	7	PA4-13	84	0.248691
HLLF	high	low	7	PA4-13	98	0.253145
HLLF	high	low	7	PA4-13	112	0.253738
HLLF	high	low	7	PA1-7	14	0.10283
HLLF	high	low	7	PA1-7	28	0.10038
HLLF	high	low	7	PA1-7	42	0.217303
HLLF	high	low	7	PA1-7	56	0.176938
HLLF	high	low	7	PA1-7	70	0.222439
HLLF	high	low	7	PA1-7	84	0.237453
HLLF	high	low	7	PA1-7	98	0.24202
HLLF	high	low	7	PA1-7	112	0.221347
LLLF	low	low	8	PA1-4	14	0.0920171
LLLF	low	low	8	PA1-4	28	0.0678137
LLLF	low	low	8	PA1-4	42	0.197039
LLLF	low	low	8	PA1-4	56	0.161233
LLLF	low	low	8	PA1-4	70	0.136403
LLLF	low	low	8	PA1-4	84	0.151622
LLLF	low	low	8	PA1-4	98	0.133826
LLLF	low	low	8	PA1-4	112	0.117796
LLLF	low	low	8	PA4-19	14	0.0377765
LLLF	low	low	8	PA4-19	28	0.0368809
LLLF	low	low	8	PA4-19	42	0.114315
LLLF	low	low	8	PA4-19	56	0.359452
LLLF	low	low	8	PA4-19	70	0.294299
LLLF	low	low	8	PA4-19	84	0.182479
LLLF	low	low	8	PA4-19	98	0.159281
LLLF	low	low	8	PA4-19	112	0.157986
LLLF	low	low	8	PA4-6	14	0.0927966
LLLF	low	low	8	PA4-6	28	0.0862887
LLLF	low	low	8	PA4-6	42	0.188275
LLLF	low	low	8	PA4-6	56	0.201315
LLLF	low	low	8	PA4-6	70	0.199083
LLLF	low	low	8	PA4-6	84	0.216511
LLLF	low	low	8	PA4-6	98	0.245274
LLLF	low	low	8	PA4-6	112	0.254808
LLLF	low	low	8	PA5-9	14	0.140493
LLLF	low	low	8	PA5-9	28	0.168216
LLLF	low	low	8	PA5-9	42	0.194094
LLLF	low	low	8	PA5-9	56	0.189254
LLLF	low	low	8	PA5-9	70	0.211257
LLLF	low	low	8	PA5-9	84	0.212899
LLLF	low	low	8	PA5-9	98	0.206055
LLLF	low	low	8	PA5-9	112	0.194721
LLLF	low	low	8	PA1-1	14	0.070743
LLLF	low	low	8	PA1-1	28	0.0720561
LLLF	low	low	8	PA1-1	42	0.123314
LLLF	low	low	8	PA1-1	56	0.216736
LLLF	low	low	8	PA1-1	70	0.144231
LLLF	low	low	8	PA1-1	84	0.171048
LLLF	low	low	8	PA1-1	98	0.167759
LLLF	low	low	8	PA1-1	112	0.1627
HLHF	high	high	9	PA4-4	14	0.123605
HLHF	high	high	9	PA4-4	28	0.113714
HLHF	high	high	9	PA4-4	42	0.259513
HLHF	high	high	9	PA4-4	56	0.275835
HLHF	high	high	9	PA4-4	70	0.298866
HLHF	high	high	9	PA4-4	84	0.310539
HLHF	high	high	9	PA4-4	98	0.315945
HLHF	high	high	9	PA4-4	112	0.297646
HLHF	high	high	9	PA2-3	14	0.171705
HLHF	high	high	9	PA2-3	28	0.174941
HLHF	high	high	9	PA2-3	42	0.429754
HLHF	high	high	9	PA2-3	56	0.478658
HLHF	high	high	9	PA2-3	70	0.462376
HLHF	high	high	9	PA2-3	84	0.535439
HLHF	high	high	9	PA2-3	98	0.528386
HLHF	high	high	9	PA2-3	112	0.521472
HLHF	high	high	9	PA2-15	14	0.098351
HLHF	high	high	9	PA2-15	28	0.154557
HLHF	high	high	9	PA2-15	42	0.532859
HLHF	high	high	9	PA2-15	56	0.456623
HLHF	high	high	9	PA2-15	70	0.546349
HLHF	high	high	9	PA2-15	84	0.470968
HLHF	high	high	9	PA2-15	98	0.463342
HLHF	high	high	9	PA2-15	112	0.465983
HLHF	high	high	9	PA2-16	14	0.18604
HLHF	high	high	9	PA2-16	28	0.264097
HLHF	high	high	9	PA2-16	42	0.413932
HLHF	high	high	9	PA2-16	56	0.435145
HLHF	high	high	9	PA2-16	70	0.449024
HLHF	high	high	9	PA2-16	84	0.455404
HLHF	high	high	9	PA2-16	98	0.441359
HLHF	high	high	9	PA2-16	112	0.431575
HLHF	high	high	9	PA2-7	14	0.141178
HLHF	high	high	9	PA2-7	28	0.147681
HLHF	high	high	9	PA2-7	42	0.324534
HLHF	high	high	9	PA2-7	56	0.344691
HLHF	high	high	9	PA2-7	70	0.361138
HLHF	high	high	9	PA2-7	84	0.29384
HLHF	high	high	9	PA2-7	98	0.361695
HLHF	high	high	9	PA2-7	112	0.347023
LLHF	low	high	10	PA5-11	14	0.240806
LLHF	low	high	10	PA5-11	28	0.0516401
LLHF	low	high	10	PA5-11	42	0.243226
LLHF	low	high	10	PA5-11	56	0.265915
LLHF	low	high	10	PA5-11	70	0.272858
LLHF	low	high	10	PA5-11	84	0.277032
LLHF	low	high	10	PA5-11	98	0.271369
LLHF	low	high	10	PA5-11	112	0.38018
LLHF	low	high	10	PA1-10	14	0.189509
LLHF	low	high	10	PA1-10	28	0.115
LLHF	low	high	10	PA1-10	42	0.269556
LLHF	low	high	10	PA1-10	56	0.302385
LLHF	low	high	10	PA1-10	70	0.350453
LLHF	low	high	10	PA1-10	84	0.310441
LLHF	low	high	10	PA1-10	98	0.289849
LLHF	low	high	10	PA1-10	112	0.275573
LLHF	low	high	10	PA2-17	14	0.133597
LLHF	low	high	10	PA2-17	28	0.15
LLHF	low	high	10	PA2-17	42	0.337136
LLHF	low	high	10	PA2-17	56	0.386592
LLHF	low	high	10	PA2-17	70	0.400454
LLHF	low	high	10	PA2-17	84	0.398488
LLHF	low	high	10	PA2-17	98	0.389389
LLHF	low	high	10	PA2-17	112	0.363119
LLHF	low	high	10	PA2-20	14	0.133348
LLHF	low	high	10	PA2-20	28	0.0956166
LLHF	low	high	10	PA2-20	42	0.244289
LLHF	low	high	10	PA2-20	56	0.263627
LLHF	low	high	10	PA2-20	70	0.359992
LLHF	low	high	10	PA2-20	84	0.26137
LLHF	low	high	10	PA2-20	98	0.264086
LLHF	low	high	10	PA2-20	112	0.252304
LLHF	low	high	10	PA2-14	14	0.212807
LLHF	low	high	10	PA2-14	28	0.174303
LLHF	low	high	10	PA2-14	42	0.424736
LLHF	low	high	10	PA2-14	56	0.562863
LLHF	low	high	10	PA2-14	70	0.519229
LLHF	low	high	10	PA2-14	84	0.486551
LLHF	low	high	10	PA2-14	98	0.482377
LLHF	low	high	10	PA2-14	112	0.458132
HLLF	high	low	11	PA4-16	14	-0.00843677
HLLF	high	low	11	PA4-16	28	0.498662
HLLF	high	low	11	PA4-16	42	0.408532
HLLF	high	low	11	PA4-16	56	0.507148
HLLF	high	low	11	PA4-16	70	0.569435
HLLF	high	low	11	PA4-16	84	0.561032
HLLF	high	low	11	PA4-16	98	0.57447
HLLF	high	low	11	PA4-16	112	0.513773
HLLF	high	low	11	PA1-11	14	0.348216
HLLF	high	low	11	PA1-11	28	0.47579
HLLF	high	low	11	PA1-11	42	0.696716
HLLF	high	low	11	PA1-11	56	1.41213
HLLF	high	low	11	PA1-11	70	1.24256
HLLF	high	low	11	PA1-11	84	1.06479
HLLF	high	low	11	PA1-11	98	1.0167
HLLF	high	low	11	PA1-11	112	0.91801
HLLF	high	low	11	PA2-8	14	0.14889
HLLF	high	low	11	PA2-8	28	0.313517
HLLF	high	low	11	PA2-8	42	0.723639
HLLF	high	low	11	PA2-8	56	0.52345
HLLF	high	low	11	PA2-8	70	0.629389
HLLF	high	low	11	PA2-8	84	0.566154
HLLF	high	low	11	PA2-8	98	0.560505
HLLF	high	low	11	PA2-8	112	0.554359
HLLF	high	low	11	PA4-20	14	0.0872707
HLLF	high	low	11	PA4-20	28	0.145956
HLLF	high	low	11	PA4-20	42	0.217228
HLLF	high	low	11	PA4-20	56	0.255211
HLLF	high	low	11	PA4-20	70	0.265705
HLLF	high	low	11	PA4-20	84	0.313368
HLLF	high	low	11	PA4-20	98	0.3347
HLLF	high	low	11	PA4-20	112	0.983218
HLLF	high	low	11	PA2-11	14	0.0837852
HLLF	high	low	11	PA2-11	28	0.235626
HLLF	high	low	11	PA2-11	42	0.403801
HLLF	high	low	11	PA2-11	56	0.432972
HLLF	high	low	11	PA2-11	70	0.45247
HLLF	high	low	11	PA2-11	84	0.48586
HLLF	high	low	11	PA2-11	98	0.506639
HLLF	high	low	11	PA2-11	112	0.487464
LLLF	low	low	12	PA2-6	14	0.16441
LLLF	low	low	12	PA2-6	28	0.241255
LLLF	low	low	12	PA2-6	42	0.526967
LLLF	low	low	12	PA2-6	56	0.570579
LLLF	low	low	12	PA2-6	70	0.603068
LLLF	low	low	12	PA2-6	84	0.614775
LLLF	low	low	12	PA2-6	98	0.627376
LLLF	low	low	12	PA2-6	112	0.581236
LLLF	low	low	12	PA1-2	14	0.252738
LLLF	low	low	12	PA1-2	28	0.0115833
LLLF	low	low	12	PA1-2	42	0.2218
LLLF	low	low	12	PA1-2	56	0.251438
LLLF	low	low	12	PA1-2	70	0.263761
LLLF	low	low	12	PA1-2	84	0.261639
LLLF	low	low	12	PA1-2	98	0.236736
LLLF	low	low	12	PA1-2	112	0.300434
LLLF	low	low	12	PA2-10	14	0.120622
LLLF	low	low	12	PA2-10	28	0.112122
LLLF	low	low	12	PA2-10	42	0.230816
LLLF	low	low	12	PA2-10	56	0.263711
LLLF	low	low	12	PA2-10	70	0.444506
LLLF	low	low	12	PA2-10	84	0.276512
LLLF	low	low	12	PA2-10	98	0.350476
LLLF	low	low	12	PA2-10	112	0.445618
LLLF	low	low	12	PA1-12	14	-0.134329
LLLF	low	low	12	PA1-12	28	0.0866518
LLLF	low	low	12	PA1-12	42	0.129078
LLLF	low	low	12	PA1-12	56	0.139892
LLLF	low	low	12	PA1-12	70	0.189033
LLLF	low	low	12	PA1-12	84	0.164162
LLLF	low	low	12	PA1-12	98	0.146924
LLLF	low	low	12	PA1-12	112	0.142795
LLLF	low	low	12	PA4-1	14	0.138784
LLLF	low	low	12	PA4-1	28	0.20949
LLLF	low	low	12	PA4-1	42	0.295781
LLLF	low	low	12	PA4-1	56	0.342135
LLLF	low	low	12	PA4-1	70	0.339817
LLLF	low	low	12	PA4-1	84	0.358205
LLLF	low	low	12	PA4-1	98	0.352191
LLLF	low	low	12	PA4-1	112	0.335125

## Sheet: TLE
treatment	food	light	tank	nubbin-day	nubbin	day	length (cm)	width (cm)	height (cm)	TLE (cm)
HLHF	high	high	1	PA4-17-0	PA4-17	0	3.1	2.6	2.8	8.5
HLHF	high	high	1	PA4-9-0	PA4-9	0	3.4	3.2	3	9.6
HLHF	high	high	1	PA2-9-0	PA2-9	0	3.8	2.7	2.4	8.9
HLHF	high	high	1	PA5-6-0	PA5-6	0	3.3	2.8	3.6	9.7
HLHF	high	high	1	PA2-19-0	PA2-19	0	2.9	2.3	2.7	7.9
LLHF	high	low	1	PA5-1-0	PA5-1	0	4.6	3	3.3	10.9
LLHF	high	low	1	PA2-18-0	PA2-18	0	3.7	2.2	2.5	8.4
LLHF	high	low	1	PA4-3-0	PA4-3	0	3.8	4	2.8	10.6
LLHF	high	low	1	PA5-5-0	PA5-5	0	3.6	3.6	3.3	10.5
LLHF	high	low	1	PA2-12-0	PA2-12	0	3.1	2.1	2.7	7.9
HLLF	low	high	1	PA2-1-0	PA2-1	0	2.7	2.5	1.7	6.9
HLLF	low	high	1	PA2-5-0	PA2-5	0	3	2.2	2.1	7.3
HLLF	low	high	1	PA2-13-0	PA2-13	0	2.5	1.4	2.9	6.8
HLLF	low	high	1	PA5-3-0	PA5-3	0	3.7	2.7	2.6	9
HLLF	low	high	1	PA4-2-0	PA4-2	0	4.1	3.4	3.9	11.4
LLLF	low	low	1	PA2-4-0	PA2-4	0	2.9	2	2.9	7.8
LLLF	low	low	1	PA4-7-0	PA4-7	0	3	2.3	2	7.3
LLLF	low	low	1	PA1-9-0	PA1-9	0	3	1.5	3.3	7.8
LLLF	low	low	1	PA5-10-0	PA5-10	0	4.2	2.4	3	9.6
LLLF	low	low	1	PA1-5-0	PA1-5	0	5.1	2.9	3.6	11.6
HLHF	high	high	2	PA4-12-0	PA4-12	0	2.7	2.3	2	7
HLHF	high	high	2	PA4-10-0	PA4-10	0	3.42	2	2.5	7.92
HLHF	high	high	2	PA5-8-0	PA5-8	0	4.8	2.4	2.8	10
HLHF	high	high	2	PA4-18-0	PA4-18	0	3.5	1.2	2.1	7.7
HLHF	high	high	2	PA4-5-0	PA4-5	0	4.3	2.3	2.3	8.9
LLHF	high	low	2	PA1-3-0	PA1-3	0	3.1	2.2	3.3	8.6
LLHF	high	low	2	PA4-11-0	PA4-11	0	1.4	3.4	3.7	8.5
LLHF	high	low	2	PA5-7-0	PA5-7	0	3.5	3	3.2	9.7
LLHF	high	low	2	PA4-14-0	PA4-14	0	2.1	1	1.7	5.3
LLHF	high	low	2	PA4-8-0	PA4-8	0	3	1.7	2	6.7
HLLF	low	high	2	PA5-2-0	PA5-2	0	4.7	3.4	3.3	11.4
HLLF	low	high	2	PA4-13-0	PA4-13	0	3	1.4	2.5	6.9
HLLF	low	high	2	PA5-4-0	PA5-4	0	3.6	2.1	3.1	8.8
HLLF	low	high	2	PA1-8-0	PA1-8	0	2.2	1.9	2.9	7
HLLF	low	high	2	PA1-7-0	PA1-7	0	4.2	3.3	2.5	10
HLLF	low	high	2	PA1-4-0	PA1-4	0	4.1	3	3.2	10.3
HLLF	low	high	2	PA5-9-0	PA5-9	0	3	1.5	2.8	7.8
HLLF	low	high	2	PA4-19-0	PA4-19	0	2.8	1.7	3	7.5
LLLF	low	low	2	PA4-6-0	PA4-6	0	2.89	3	3.1	8.99
LLLF	low	low	2	PA1-1-0	PA1-1	0	3.5	2	3.3	8.8
HLHF	high	high	3	PA4-4-0	PA4-4	0	3.4	3	3.4	9.8
HLHF	high	high	3	PA2-3-0	PA2-3	0	3.4	1.6	2.5	7.5
HLHF	high	high	3	PA2-16-0	PA2-16	0	3.2	2.7	2.1	8
HLHF	high	high	3	PA2-15-0	PA2-15	0	2.2	0.125	2	4.325
HLHF	high	high	3	PA2-7-0	PA2-7	0	4	3.1	2.8	9.9
LLHF	high	low	3	PA5-11-0	PA5-11	0	3.3	2.7	3	9
LLHF	high	low	3	PA1-10-0	PA1-10	0	4	1.6	1.6	7.2
LLHF	high	low	3	PA2-17-0	PA2-17	0	3.5	2.9	1.1	7.5
LLHF	high	low	3	PA2-20-0	PA2-20	0	2.5	2.4	2.1	7
LLHF	high	low	3	PA2-14-0	PA2-14	0	1.6	1.4	3.3	6.8
HLLF	low	high	3	PA4-16-0	PA4-16	0	2	1	2	5
HLLF	low	high	3	PA1-11-0	PA1-11	0	3.2	2.7	4	9.9
HLLF	low	high	3	PA2-8-0	PA2-8	0	2.2	2.2	2.7	7.1
HLLF	low	high	3	PA4-20-0	PA4-20	0	1.8	1.4	1.5	4.7
HLLF	low	high	3	PA2-11-0	PA2-11	0	2.8	2	2.3	7.1
LLLF	low	low	3	PA2-6-0	PA2-6	0	3.6	2.8	2	8.4
LLLF	low	low	3	PA1-2-0	PA1-2	0	3.8	3	3	9.8
LLLF	low	low	3	PA1-12-0	PA1-12	0	4	3.5	3.7	11.2
LLLF	low	low	3	PA4-1-0	PA4-1	0	2.1	1.1	2.1	5.3
LLLF	low	low	3	PA2-10-0	PA2-10	0	3.9	2.2	2.5	8.6
HLHF	high	high	1	PA4-17-30	PA4-17	30	3.1	2.4	2.9	8.4
HLHF	high	high	1	PA4-9-30	PA4-9	30	3.6	2.9	3	9.5
HLHF	high	high	1	PA2-9-30	PA2-9	30	3.8	2.6	2.5	8.9
HLHF	high	high	1	PA5-6-30	PA5-6	30	4	3.1	3.5	10.6
HLHF	high	high	1	PA2-19-30	PA2-19	30	3.3	2.7	2.6	8.6
LLHF	high	low	1	PA5-1-30	PA5-1	30	4.8	3.1	3.4	11.3
LLHF	high	low	1	PA2-18-30	PA2-18	30	3.5	2.2	2.8	8.5
LLHF	high	low	1	PA4-3-30	PA4-3	30	4	4	2.6	10.6
LLHF	high	low	1	PA5-5-30	PA5-5	30	4.6	3.7	3.3	11.6
LLHF	high	low	1	PA2-12-30	PA2-12	30	3.1	2.7	2.8	8.6
HLLF	low	high	1	PA2-1-30	PA2-1	30	2.8	2.8	1.6	7.2
HLLF	low	high	1	PA2-5-30	PA2-5	30	3.4	2.3	2	7.7
HLLF	low	high	1	PA2-13-30	PA2-13	30	2.6	1.6	2.9	7.1
HLLF	low	high	1	PA5-3-30	PA5-3	30	4	2.5	2.5	9
HLLF	low	high	1	PA4-2-30	PA4-2	30	4	3.6	3.7	11.3
LLLF	low	low	1	PA2-4-30	PA2-4	30	2.9	1.9	2.8	7.6
LLLF	low	low	1	PA4-7-30	PA4-7	30	3.1	2.4	2.3	7.8
LLLF	low	low	1	PA1-9-30	PA1-9	30	3.2	1.7	3	8.1
LLLF	low	low	1	PA5-10-30	PA5-10	30	4.8	2.2	2.8	9.8
LLLF	low	low	1	PA1-5-30	PA1-5	30	5.4	3	4	12.4
HLHF	high	high	2	PA4-12-30	PA4-12	30	2.7	2.5	2.1	7.3
HLHF	high	high	2	PA4-10-30	PA4-10	30	4	2.3	2.4	8.7
HLHF	high	high	2	PA5-8-30	PA5-8	30	5	2.2	2.8	10
HLHF	high	high	2	PA4-18-30	PA4-18	30	3.5	1.3	2	6.8
HLHF	high	high	2	PA4-5-30	PA4-5	30	4.4	2.4	2.4	9.2
LLHF	high	low	2	PA1-3-30	PA1-3	30	3.4	2	3	8.4
LLHF	high	low	2	PA4-11-30	PA4-11	30	4.6	3.4	3.8	11.8
LLHF	high	low	2	PA5-7-30	PA5-7	30	3.8	3.2	3.5	10.5
LLHF	high	low	2	PA4-14-30	PA4-14	30	2.1	1.1	1.9	5.1
LLHF	high	low	2	PA4-8-30	PA4-8	30	3	1.7	2.3	7
HLLF	low	high	2	PA5-2-30	PA5-2	30	4.8	3.4	3.4	11.6
HLLF	low	high	2	PA4-13-30	PA4-13	30	3.1	1.5	2.4	7
HLLF	low	high	2	PA5-4-30	PA5-4	30	3.6	2	3.1	8.7
HLLF	low	high	2	PA1-8-30	PA1-8	30	2.4	2	3.1	7.5
HLLF	low	high	2	PA1-7-30	PA1-7	30	4.4	3.6	2.7	10.7
HLLF	low	high	2	PA1-4-30	PA1-4	30	4.8	4.4	3.3	12.5
HLLF	low	high	2	PA5-9-30	PA5-9	30	3.1	1.4	2.5	7
HLLF	low	high	2	PA4-19-30	PA4-19	30	3.6	1.8	3.1	8.5
LLLF	low	low	2	PA4-6-30	PA4-6	30	3	3	3	9
LLLF	low	low	2	PA1-1-30	PA1-1	30	3.3	2	3.4	8.7
HLHF	high	high	3	PA4-4-30	PA4-4	30	4.3	3.1	3.2	10.6
HLHF	high	high	3	PA2-3-30	PA2-3	30	3.4	1.8	2	7.2
HLHF	high	high	3	PA2-16-30	PA2-16	30	3.1	2.3	2.3	7.7
HLHF	high	high	3	PA2-15-30	PA2-15	30	2.7	1.7	2	6.4
HLHF	high	high	3	PA2-7-30	PA2-7	30	4.2	3	3	10.2
LLHF	high	low	3	PA5-11-30	PA5-11	30	4.2	2.8	3.3	10.3
LLHF	high	low	3	PA1-10-30	PA1-10	30	4.1	1.6	2.5	8.2
LLHF	high	low	3	PA2-17-30	PA2-17	30	3.1	1.3	2.3	6.7
LLHF	high	low	3	PA2-20-30	PA2-20	30	4	2.5	3.6	10.1
LLHF	high	low	3	PA2-14-30	PA2-14	30	1.9	1.3	3	5.9
HLLF	low	high	3	PA4-16-30	PA4-16	30	1.9	0.9	2.2	5
HLLF	low	high	3	PA1-11-30	PA1-11	30	3.3	2.9	4.1	10.3
HLLF	low	high	3	PA2-8-30	PA2-8	30	2.4	2.1	2.5	7
HLLF	low	high	3	PA4-20-30	PA4-20	30	1.8	2	2.1	5.9
HLLF	low	high	3	PA2-11-30	PA2-11	30	2.5	1.8	2.5	6.8
LLLF	low	low	3	PA2-6-30	PA2-6	30	3.6	2.8	2	8.4
LLLF	low	low	3	PA1-2-30	PA1-2	30	4.5	3.2	3.2	10.9
LLLF	low	low	3	PA1-12-30	PA1-12	30	4.4	3.4	3.8	11.2
LLLF	low	low	3	PA4-1-30	PA4-1	30	2.2	1.1	2.2	5.4
LLLF	low	low	3	PA2-10-30	PA2-10	30	4.1	2.4	2.6	9.1
HLHF	high	high	1	PA4-17-60	PA4-17	60	3.6	2.4	3	9
HLHF	high	high	1	PA4-9-60	PA4-9	60	3.9	3	3.4	10.3
HLHF	high	high	1	PA2-9-60	PA2-9	60	4	2.6	2.3	8.9
HLHF	high	high	1	PA5-6-60	PA5-6	60	4.4	3.1	3.6	11.1
HLHF	high	high	1	PA2-19-60	PA2-19	60	2.9	2.9	1.8	7.6
LLHF	high	low	1	PA5-1-60	PA5-1	60	5	3.1	3.5	11.6
LLHF	high	low	1	PA2-18-60	PA2-18	60	4	2.4	2.6	9
LLHF	high	low	1	PA4-3-60	PA4-3	60	4.2	4.2	2.6	11
LLHF	high	low	1	PA5-5-60	PA5-5	60	4.8	3.7	3.3	11.8
LLHF	high	low	1	PA2-12-60	PA2-12	60	2.9	2.1	2.9	7.9
HLLF	low	high	1	PA2-1-60	PA2-1	60	2.9	2.1	3.3	8.3
HLLF	low	high	1	PA2-5-60	PA2-5	60	3.6	2.4	2.1	8.1
HLLF	low	high	1	PA2-13-60	PA2-13	60	3.7	2.2	2.2	8.1
HLLF	low	high	1	PA5-3-60	PA5-3	60	4.3	3.2	2.8	10.3
HLLF	low	high	1	PA4-2-60	PA4-2	60	4.1	4.2	2.9	11.2
LLLF	low	low	1	PA2-4-60	PA2-4	60	4.1	2.5	3.1	9.7
LLLF	low	low	1	PA4-7-60	PA4-7	60	3.2	2.5	2.4	8.1
LLLF	low	low	1	PA1-9-60	PA1-9	60	3.9	1.9	3.1	8.7
LLLF	low	low	1	PA5-10-60	PA5-10	60	4.9	2.5	2.9	10.3
LLLF	low	low	1	PA1-5-60	PA1-5	60	5	3.2	3.8	12
HLHF	high	high	2	PA4-12-60	PA4-12	60	2.8	2.2	2.4	7
HLHF	high	high	2	PA4-10-60	PA4-10	60	4	2.5	2.5	9
HLHF	high	high	2	PA5-8-60	PA5-8	60	5.1	2.1	3	10.2
HLHF	high	high	2	PA4-18-60	PA4-18	60	3.6	1.5	2.2	6.9
HLHF	high	high	2	PA4-5-60	PA4-5	60	4.4	2.5	2.4	9.3
LLHF	high	low	2	PA1-3-60	PA1-3	60	3.9	2.6	3.3	9.8
LLHF	high	low	2	PA4-11-60	PA4-11	60	4.6	3.8	4.2	12.6
LLHF	high	low	2	PA5-7-60	PA5-7	60	4.1	3.8	3.3	11.2
LLHF	high	low	2	PA4-14-60	PA4-14	60	2.2	1	2	5.5
LLHF	high	low	2	PA4-8-60	PA4-8	60	2.8	2.1	2.3	7.2
HLLF	low	high	2	PA5-2-60	PA5-2	60	4.8	3.4	4.4	12.6
HLLF	low	high	2	PA4-13-60	PA4-13	60	3.1	1.4	3.7	8.2
HLLF	low	high	2	PA5-4-60	PA5-4	60	3.7	2.5	3.2	9.4
HLLF	low	high	2	PA1-8-60	PA1-8	60	2.4	1.9	3	7.3
HLLF	low	high	2	PA1-7-60	PA1-7	60	4.4	4	3.3	11.7
HLLF	low	high	2	PA1-4-60	PA1-4	60	5.1	4.4	3.3	12.8
HLLF	low	high	2	PA5-9-60	PA5-9	60	3.7	1.8	3.8	9.3
HLLF	low	high	2	PA4-19-60	PA4-19	60	3.4	1.8	3.1	8.3
LLLF	low	low	2	PA4-6-60	PA4-6	60	3.3	3.1	2.9	9.3
LLLF	low	low	2	PA1-1-60	PA1-1	60	4.4	1.8	3.4	9.6
HLHF	high	high	3	PA4-4-60	PA4-4	60	4.5	3.4	3.5	11.4
HLHF	high	high	3	PA2-3-60	PA2-3	60	3.6	2.6	2.9	9.1
HLHF	high	high	3	PA2-16-60	PA2-16	60	3.4	2.8	2.6	8.8
HLHF	high	high	3	PA2-15-60	PA2-15	60	3.1	2	2.6	7.7
HLHF	high	high	3	PA2-7-60	PA2-7	60	4.4	3.1	3.3	10.8
LLHF	high	low	3	PA5-11-60	PA5-11	60	4.1	3	3.5	10.6
LLHF	high	low	3	PA1-10-60	PA1-10	60	4.3	1.8	2.6	8.7
LLHF	high	low	3	PA2-17-60	PA2-17	60	3.8	1.1	2.9	7.8
LLHF	high	low	3	PA2-20-60	PA2-20	60	4.4	2.5	3.6	10.5
LLHF	high	low	3	PA2-14-60	PA2-14	60	2.1	1.2	3.2	6.3
HLLF	low	high	3	PA4-16-60	PA4-16	60	2.5	1.2	2.7	6.4
HLLF	low	high	3	PA1-11-60	PA1-11	60	3.4	3	4	10.4
HLLF	low	high	3	PA2-8-60	PA2-8	60	2.7	2.2	2.3	7.2
HLLF	low	high	3	PA4-20-60	PA4-20	60	2.2	1.7	2.4	6.3
HLLF	low	high	3	PA2-11-60	PA2-11	60	2.8	2.2	2.8	7.8
LLLF	low	low	3	PA2-6-60	PA2-6	60	3.8	2.8	2.4	9
LLLF	low	low	3	PA1-2-60	PA1-2	60	4.7	3.2	3.5	11.4
LLLF	low	low	3	PA1-12-60	PA1-12	60	4.7	2	3.5	10.2
LLLF	low	low	3	PA4-1-60	PA4-1	60	2.6	1.3	2.4	6.3
LLLF	low	low	3	PA2-10-60	PA2-10	60	4.4	2.6	3.2	10.2
HLHF	high	high	1	PA4-17-90	PA4-17	90	4	2.6	3	9.6
HLHF	high	high	1	PA4-9-90	PA4-9	90	4	3.5	3.7	11.2
HLHF	high	high	1	PA2-9-90	PA2-9	90	4.3	2.8	2.8	9.9
HLHF	high	high	1	PA5-6-90	PA5-6	90	5	3.2	4	12.2
HLHF	high	high	1	PA2-19-90	PA2-19	90	4	3.3	3.5	10.8
LLHF	high	low	1	PA5-1-90	PA5-1	90	5.5	3.3	3.6	12.4
LLHF	high	low	1	PA2-18-90	PA2-18	90	4.4	3.1	2.8	10.3
LLHF	high	low	1	PA4-3-90	PA4-3	90	4.7	4.6	3.5	12.8
LLHF	high	low	1	PA5-5-90	PA5-5	90	5	3.8	4	12.8
LLHF	high	low	1	PA2-12-90	PA2-12	90	4	3.1	3.5	10.6
HLLF	low	high	1	PA2-1-90	PA2-1	90	3.2	3.2	1.8	8.2
HLLF	low	high	1	PA2-5-90	PA2-5	90	4.2	2.6	3	9.8
HLLF	low	high	1	PA2-13-90	PA2-13	90	3.3	2.2	3	8.5
HLLF	low	high	1	PA5-3-90	PA5-3	90	4.7	2.8	3.4	10.9
HLLF	low	high	1	PA4-2-90	PA4-2	90	5	4.1	4	13.1
LLLF	low	low	1	PA2-4-90	PA2-4	90	3.7	2.5	3	9.2
LLLF	low	low	1	PA4-7-90	PA4-7	90	3.5	2.5	2.7	8.7
LLLF	low	low	1	PA1-9-90	PA1-9	90	4.6	2.9	3.3	10.8
LLLF	low	low	1	PA5-10-90	PA5-10	90	5.6	2.9	3.7	12.2
LLLF	low	low	1	PA1-5-90	PA1-5	90	6.1	3.4	5	14.5
HLHF	high	high	2	PA4-12-90	PA4-12	90	2.8	2.3	2.2	7
HLHF	high	high	2	PA4-10-90	PA4-10	90	4	2.2	2.8	9
HLHF	high	high	2	PA5-8-90	PA5-8	90	5.1	2.6	3	10.7
HLHF	high	high	2	PA4-18-90	PA4-18	90	3.6	1.5	2.4	7.5
HLHF	high	high	2	PA4-5-90	PA4-5	90	4.4	2.5	2.6	7.5
LLHF	high	low	2	PA1-3-90	PA1-3	90	4	4.2	3.3	11.5
LLHF	high	low	2	PA4-11-90	PA4-11	90	4.6	3.8	4	12.4
LLHF	high	low	2	PA5-7-90	PA5-7	90	3.9	3.8	3.6	11.3
LLHF	high	low	2	PA4-14-90	PA4-14	90	2.5	1.1	1.7	5.3
LLHF	high	low	2	PA4-8-90	PA4-8	90	3.1	2.2	2.3	7.6
HLLF	low	high	2	PA5-2-90	PA5-2	90	4.8	3.5	4.4	12.7
HLLF	low	high	2	PA4-13-90	PA4-13	90	3.1	1.5	3.6	8.2
HLLF	low	high	2	PA5-4-90	PA5-4	90	3.8	2.6	3.2	9.6
HLLF	low	high	2	PA1-8-90	PA1-8	90	2.4	2	3.1	7.5
HLLF	low	high	2	PA1-7-90	PA1-7	90	4.4	3.7	3	11.1
HLLF	low	high	2	PA1-4-90	PA1-4	90	4.7	3	3.5	11.2
HLLF	low	high	2	PA5-9-90	PA5-9	90	3.2	1.5	3	7.7
HLLF	low	high	2	PA4-19-90	PA4-19	90	3.6	1.8	3.4	8.8
LLLF	low	low	2	PA4-6-90	PA4-6	90	3.2	3	3.3	9.5
LLLF	low	low	2	PA1-1-90	PA1-1	90	4	2.6	3.3	9.9
HLHF	high	high	3	PA4-4-90	PA4-4	90	4.1	3.5	4	11.6
HLHF	high	high	3	PA2-3-90	PA2-3	90	3.6	2.6	2.9	9.1
HLHF	high	high	3	PA2-16-90	PA2-16	90	3.3	2.7	3	9
HLHF	high	high	3	PA2-15-90	PA2-15	90	3.2	2.2	2.1	7.5
HLHF	high	high	3	PA2-7-90	PA2-7	90	4.5	3.3	3.5	11.3
LLHF	high	low	3	PA5-11-90	PA5-11	90	4.3	3.3	4.3	11.9
LLHF	high	low	3	PA1-10-90	PA1-10	90	4.4	2	3.1	9.5
LLHF	high	low	3	PA2-17-90	PA2-17	90	4	3	2.4	9.4
LLHF	high	low	3	PA2-20-90	PA2-20	90	4.1	2.4	3.8	10.3
LLHF	high	low	3	PA2-14-90	PA2-14	90	2.2	1.8	3.5	7.5
HLLF	low	high	3	PA4-16-90	PA4-16	90	3.2	1.5	2.5	7.2
HLLF	low	high	3	PA1-11-90	PA1-11	90	3.5	3	4.5	11
HLLF	low	high	3	PA2-8-90	PA2-8	90	3	2.6	2.8	8.4
HLLF	low	high	3	PA4-20-90	PA4-20	90	2.4	1.9	2.1	6.4
HLLF	low	high	3	PA2-11-90	PA2-11	90	3.6	2.8	3	9.4
LLLF	low	low	3	PA2-6-90	PA2-6	90	4	3	3.4	10.4
LLLF	low	low	3	PA1-2-90	PA1-2	90	5	3.3	3.4	11.7
LLLF	low	low	3	PA1-12-90	PA1-12	90	4.6	4.4	4.6	13.6
LLLF	low	low	3	PA4-1-90	PA4-1	90	2.2	1.7	2.1	6
LLLF	low	low	3	PA2-10-90	PA2-10	90	4.5	2.8	3	10.3
HLHF	high	high	1	PA4-17-120	PA4-17	120	4.4	3.1	3.4	10.9
HLHF	high	high	1	PA4-9-120	PA4-9	120	4.6	3.5	3.9	12
HLHF	high	high	1	PA2-9-120	PA2-9	120	4.7	3.8	3	11.5
HLHF	high	high	1	PA5-6-120	PA5-6	120	5	4.5	4.5	14
HLHF	high	high	1	PA2-19-120	PA2-19	120	4.4	3.8	3.6	11.8
LLHF	high	low	1	PA5-1-120	PA5-1	120	6.1	4.3	4.4	14.8
LLHF	high	low	1	PA2-18-120	PA2-18	120	4.8	3.3	3.5	11.6
LLHF	high	low	1	PA4-3-120	PA4-3	120	5	4.9	4.1	14
LLHF	high	low	1	PA5-5-120	PA5-5	120	5.5	4.1	4.2	13.8
LLHF	high	low	1	PA2-12-120	PA2-12	120	4.4	3.9	3.5	11.8
HLLF	low	high	1	PA2-1-120	PA2-1	120	3.8	3.7	2.4	9.9
HLLF	low	high	1	PA2-5-120	PA2-5	120	4	3.5	2.9	10.4
HLLF	low	high	1	PA2-13-120	PA2-13	120	3.8	2.9	3.1	9.8
HLLF	low	high	1	PA5-3-120	PA5-3	120	5.2	3.3	3.3	11.8
HLLF	low	high	1	PA4-2-120	PA4-2	120	5.1	4.8	4.8	14.7
LLLF	low	low	1	PA2-4-120	PA2-4	120	4	3.3	3.5	10.8
LLLF	low	low	1	PA4-7-120	PA4-7	120	4.1	2.8	3.5	10.4
LLLF	low	low	1	PA1-9-120	PA1-9	120	5.3	3.7	4	13
LLLF	low	low	1	PA5-10-120	PA5-10	120	6.3	3.5	4.1	13.9
LLLF	low	low	1	PA1-5-120	PA1-5	120	6.4	4	5.5	15.9
HLHF	high	high	2	PA4-12-120	PA4-12	120	2.9	2.4	2.4	7.7
HLHF	high	high	2	PA4-10-120	PA4-10	120	4.5	2.5	2.7	9.7
HLHF	high	high	2	PA5-8-120	PA5-8	120	4.8	3	3.4	11.2
HLHF	high	high	2	PA4-18-120	PA4-18	120	3.7	2.7	2.7	9.1
HLHF	high	high	2	PA4-5-120	PA4-5	120	4.5	2.6	2.8	9.9
LLHF	high	low	2	PA1-3-120	PA1-3	120	4.1	4.4	3.3	11.8
LLHF	high	low	2	PA4-11-120	PA4-11	120	4	5.4	3.8	13.2
LLHF	high	low	2	PA5-7-120	PA5-7	120	3.9	4	3.5	11.4
LLHF	high	low	2	PA4-14-120	PA4-14	120	2.5	1.1	2.1	5.7
LLHF	high	low	2	PA4-8-120	PA4-8	120	3.1	2.4	2.5	8
HLLF	low	high	2	PA5-2-120	PA5-2	120	5.1	3.6	4.4	13.1
HLLF	low	high	2	PA4-13-120	PA4-13	120	3.1	1.8	3	7.9
HLLF	low	high	2	PA5-4-120	PA5-4	120	3.6	2.7	3.8	10.1
HLLF	low	high	2	PA1-8-120	PA1-8	120	2.4	2.4	3.1	7.9
HLLF	low	high	2	PA1-7-120	PA1-7	120	4.5	4.3	2.9	11.7
HLLF	low	high	2	PA1-4-120	PA1-4	120	5.4	3.6	3.7	12.7
HLLF	low	high	2	PA5-9-120	PA5-9	120	3.2	2	3	8.2
HLLF	low	high	2	PA4-19-120	PA4-19	120	3.2	2.2	4	9.4
LLLF	low	low	2	PA4-6-120	PA4-6	120	3.2	3.1	3	9.3
LLLF	low	low	2	PA1-1-120	PA1-1	120	4.1	2.3	3.4	9.8
HLHF	high	high	3	PA4-4-120	PA4-4	120	4.2	3.4	4.1	11.7
HLHF	high	high	3	PA2-3-120	PA2-3	120	3.7	3.4	3.1	10.2
HLHF	high	high	3	PA2-16-120	PA2-16	120	3.4	3.8	2.8	10
HLHF	high	high	3	PA2-15-120	PA2-15	120	3.3	2.2	2.3	7.8
HLHF	high	high	3	PA2-7-120	PA2-7	120	4.2	3.4	3.1	10.7
LLHF	high	low	3	PA5-11-120	PA5-11	120	4.4	3.3	4	11.7
LLHF	high	low	3	PA1-10-120	PA1-10	120	4.8	2	3.5	10.3
LLHF	high	low	3	PA2-17-120	PA2-17	120	4	3	3.8	10.8
LLHF	high	low	3	PA2-20-120	PA2-20	120	4.6	3.5	3.4	11.5
LLHF	high	low	3	PA2-14-120	PA2-14	120	2.5	2	3.3	7.8
HLLF	low	high	3	PA4-16-120	PA4-16	120	3.3	1.8	2.9	8
HLLF	low	high	3	PA1-11-120	PA1-11	120	3.3	3.4	4.6	11.3
HLLF	low	high	3	PA2-8-120	PA2-8	120	2.9	3	3.4	9.3
HLLF	low	high	3	PA4-20-120	PA4-20	120	2.5	2.1	2.6	7.2
HLLF	low	high	3	PA2-11-120	PA2-11	120	4	3.5	2.7	10.2
LLLF	low	low	3	PA2-6-120	PA2-6	120	4.5	3.6	2.6	10.7
LLLF	low	low	3	PA1-2-120	PA1-2	120	3.8	4.9	3.6	12.3
LLLF	low	low	3	PA1-12-120	PA1-12	120	4.1	4.6	4.3	13
LLLF	low	low	3	PA4-1-120	PA4-1	120	2.6	1.8	3.1	7.5
LLLF	low	low	3	PA2-10-120	PA2-10	120	4.8	3.1	3.6	11.5

## Sheet: Fv-Fm
treatment	food	light	nubbin	tank	day 0	day 14	day 28	day 42	day 56	day 70	day 84	day 98	day 112
HLHF	high	high	PA4-17	1	0.715	0.779	0.629	0.79	0.623	0.67	0.712	0.771	0.717
HLHF	high	high	PA4-9	1	0.862	0.77	0.749	0.723	0.726	0.779	0.669	0.721	0.687
HLHF	high	high	PA2-9	1	0.776	0.782	0.794	0.696	0.617	0.707	0.762	0.742	0.612
HLHF	high	high	PA5-6	1	0.733	0.692	0.61	0.796	0.762	0.705	0.786	0.823	0.737
HLHF	high	high	PA2-19	1	0.736	0.826	0.629	0.684	0.667	0.741	0.766	0.739	0.748
LLHF	high	low	PA5-1	1	0.853	0.694	0.752	0.768	0.62	0.777	0.655	0.777	0.706
LLHF	high	low	PA2-18	1	0.647	0.712	0.722	0.713	0.716	0.842	0.8	0.715	0.773
LLHF	high	low	PA4-3	1	0.936	0.827	0.743	0.775	0.706	0.676	0.623	0.759	0.72
LLHF	high	low	PA5-5	1	0.818	0.712	0.687	0.746	0.683	0.61	0.732	0.736	0.761
LLHF	high	low	PA2-12	1	0.771	0.732	0.75	0.763	0.636	0.589	0.774	0.78	0.769
HLLF	low	high	PA2-1	1	0.882	0.805	0.726	0.787	0.813	0.77	0.796	0.781	0.725
HLLF	low	high	PA2-5	1	0.757	0.787	0.744	0.799	0.83	0.769	0.69	0.784	0.71
HLLF	low	high	PA2-13	1	0.885	0.635	0.752	0.806	0.713	0.781	0.799	0.793	0.627
HLLF	low	high	PA5-3	1	0.726	0.854	0.632	0.705	0.628	0.706	0.661	0.794	0.742
HLLF	low	high	PA4-2	1	0.783	0.759	0.75	0.755	0.643	0.71	0.694	0.757	0.67
LLLF	low	low	PA2-4	1	0.659	0.756	0.702	0.863	0.768	0.766	0.786	0.831	0.872
LLLF	low	low	PA4-7	1	0.715	0.653	0.725	0.878	0.697	0.748	0.744	0.834	0.841
LLLF	low	low	PA1-9	1	0.772	0.725	0.622	0.836	0.711	0.788	0.736	0.765	0.8
LLLF	low	low	PA5-10	1	0.743	0.619	0.69	0.673	0.742	0.615	0.744	0.779	0.744
LLLF	low	low	PA1-5	1	0.742	0.623	0.7	0.836	0.78	0.772	0.691	0.718	0.804
HLHF	high	high	PA4-12	2	0.65	0.675	0.726	0.724	0.753	0.571	0.788	0.603	0.684
HLHF	high	high	PA4-10	2	0.761	0.693	0.65	0.687	0.769	0.819	0.833	0.789	0.785
HLHF	high	high	PA5-8	2	0.822	0.651	0.656	0.766	0.718	0.665	0.675	0.721
HLHF	high	high	PA4-18	2	0.764	0.756	0.725	0.743	0.655	0.631	0.741	0.682
HLHF	high	high	PA4-5	2	0.717	0.887	0.673	0.8	0.78	0.649	0.759	0.757	0.622
LLHF	high	low	PA1-3	2	0.723	0.724	0.609	0.662	0.703	0.781	0.704	0.767	0.657
LLHF	high	low	PA4-11	2	0.753	0.723	0.729	0.727	0.746	0.771	0.643	0.679
LLHF	high	low	PA5-7	2	0.906	0.766	0.7	0.779	0.822	0.614	0.63	0.759
LLHF	high	low	PA4-14	2	0.841	0.764	0.699	0.78	0.569	0.685	0.773	0.822	0.648
LLHF	high	low	PA4-8	2	0.639	0.698	0.678	0.734	0.715	0.829	0.627	0.716	0.617
HLLF	low	high	PA5-2	2	0.825	0.68	0.657	0.68	0.73	0.6	0.674	0.708	0.459
HLLF	low	high	PA4-13	2	0.825	0.781	0.649	0.774	0.635	0.759	0.786	0.657	0.757
HLLF	low	high	PA5-4	2	0.652	0.733	0.704	0.8	0.633	0.653	0.659	0.858	0.769
HLLF	low	high	PA1-8	2	0.83	0.702	0.662	0.793	0.668	0.789	0.786	0.756
HLLF	low	high	PA1-7	2	0.861	0.698	0.725	0.76	0.749	0.684	0.74	0.784
LLLF	low	low	PA1-4	2	0.702	0.721	0.571	0.797	0.698	0.656	0.741	0.587
LLLF	low	low	PA5-9	2	0.712	0.704	0.669	0.72	0.816	0.728	0.778	0.669
LLLF	low	low	PA4-19	2	0.817	0.744	0.716	0.813	0.721	0.774	0.778	0.829
LLLF	low	low	PA4-6	2	0.646	0.669	0.632	0.797	0.744	0.742	0.744	0.653	0.67
LLLF	low	low	PA1-1	2	0.741	0.809	0.651	0.763	0.733	0.619	0.762	0.758	0.516
HLHF	high	high	PA4-4	3	0.76	0.76	0.657	0.756	0.72	0.557	0.74	0.727	0.734
HLHF	high	high	PA2-3	3	0.648	0.648	0.666	0.768	0.642	0.735	0.623	0.788	0.732
HLHF	high	high	PA2-16	3	0.809	0.809	0.664	0.801	0.614	0.692	0.65	0.771	0.801
HLHF	high	high	PA2-15	3	0.818	0.818	0.615	0.848	0.661	0.639	0.773	0.762	0.759
HLHF	high	high	PA2-7	3	0.758	0.653	0.6	0.758	0.762	0.565	0.677	0.78	0.766
LLHF	high	low	PA5-11	3	0.892	0.631	0.682	0.801	0.724	0.756	0.751	0.743	0.817
LLHF	high	low	PA2-9	3	0.786	0.683	0.632	0.831	0.77	0.691	0.678	0.731	0.817
LLHF	high	low	PA2-17	3	0.647	0.662	0.645	0.867	0.668	0.698	0.78	0.719	0.753
LLHF	high	low	PA2-20	3	0.725	0.668	0.726	0.736	0.626	0.771	0.793	0.743	0.791
LLHF	high	low	PA2-14	3	0.868	0.703	0.73	0.808	0.701	0.856	0.819	0.743	0.751
HLLF	low	high	PA4-16	3	0.779	0.532	0.744	0.79	0.691	0.593	0.728	0.84	0.735
HLLF	low	high	PA1-11	3	0.641	0.809	0.704	0.853	0.646	0.652	0.792	0.758	0.758
HLLF	low	high	PA2-8	3	0.699	0.726	0.622	0.77	0.77	0.58	0.719	0.731	0.79
HLLF	low	high	PA4-20	3	0.795	0.667	0.751	0.801	0.691	0.564	0.698	0.812	0.783
HLLF	low	high	PA2-11	3	0.82	0.675	0.677	0.737	0.73	0.729	0.732	0.76	0.748
LLLF	low	low	PA2-6	3	0.828	0.687	0.621	0.77	0.697	0.617	0.738	0.787	0.696
LLLF	low	low	PA1-2	3	0.865	0.726	0.709	0.773	0.792	0.749	0.7	0.815	0.746
LLLF	low	low	PA2	3	0.777	0.678	0.681	0.791	0.724	0.749	0.7	0.77	0.701
LLLF	low	low	PA4-1	3	0.704	0.838	0.692	0.786	0.776	0.59	0.748	0.761	0.71
LLLF	low	low	PA2-10	3	0.679	0.777	0.786	0.838	0.709	0.861	0.817	0.727	0.739

## Sheet: wound scores
treatment	light	food	nubbin	tank	bin	wound score-day 0	wound score-day 14	wound score-day 28	wound score change (day 28 vs. 0)
LLHF	low	low	PA2-12	1	1	0	2	2	2
HLLF	high	high	PA5-3	1	2	0	1	2	2
HLLF	high	high	PA2-5	1	3	0	1	2	2
LLLF	low	low	PA2-4	1	4	0	1	2	2
HLHF	high	high	PA4-12	2	1	0	2	2	2
HLHF	high	high	PA4-10	2	2	0	2	2	2
HLHF	high	high	PA4-18	2	3	0	1	2	2
LLHF	low	low	PA4-14	2	4	0	2	2	2
HLLF	high	high	PA4-13	2	1	0	1	2	2
LLLF	low	low	PA5-9	2	2	0	2	2	2
HLHF	high	high	PA2-16	3	3	0	2	2	2
LLHF	low	low	PA5-11	3	4	0	1	2	2
LLHF	low	low	PA2-14	3	1	0	2	2	2
LLHF	low	low	PA2-17	3	2	0	1	2	2
LLHF	low	low	PA2-20	3	3	0	1	2	2
HLLF	high	high	PA2-8	3	4	0	2	2	2
HLLF	high	high	PA4-20	3	1	0	1	2	2
HLLF	high	high	PA2-11	3	2	0	1	2	2
LLLF	low	low	PA1-12	3	3	0	1	2	2
LLLF	low	low	PA4-1	3	4	0	2	2	2
